# Supplementary material
Source: publisher site journal article supplement (https://www.dovepress.com/get_supplementary_file.php?f=474422.docx)
Supplement: Supplementary file 1 [file get_supplementary_file.php]

**Supplementary Material 1 STROBE-MR checklist of recommended items to address in reports of Mendelian randomization studies**12

| **Item No.** | **Section** | **Checklist item** | **Page No.** | **Relevant text from manuscript** |
| --- | --- | --- | --- | --- |
| 1 | **TITLE and ABSTRACT** | Indicate Mendelian randomization (MR) as the study’s design in the title and/or the abstract if that is a main purpose of the study | 1 | Crosstalk and Influence of Gut Microbiota and Short-chain Fatty Acids on Urticaria Subtypes: A Bidirectional Mendelian Randomization and Mediation Analysis Study |
|  | **INTRODUCTION** |  |  |  |
| 2 | **Background** | Explain the scientific background and rationale for the reported study. What is the exposure? Is a potential causal relationship between exposure and outcome plausible? Justify why MR is a helpful method to address the study question | 2-3 | Growing evidence suggests a link between the composition of the gut microbiota and urticaria. However, more research is needed to better understand the causal relationship between the two. To gain a deeper understanding of the association between the gut microbiota and its products short-chain fatty acids (SCFAs) and urticaria, we performed multiple Mendelian randomization (MR) analyses.  The main reason for its advantage in inferring causality is that MR employs the genetic variants as instrumental variables. |
| 3 | **Objectives** | State specific objectives clearly, including pre-specified causal hypotheses (if any). State that MR is a method that, under specific assumptions, intends to estimate causal effects | 3 | This study aims to reveal the causal links between specific gut microbiota and different urticaria subtypes through bidirectional MR analysis. Furthermore, it incorporates two-step multivariable MR (MVMR) analysis to explore the role of SCFAs in the gut microbiota's influence on urticaria.  MR Takes advantage of the fact that: (1) genetic variation is inherited randomly by one allele each from father and mother (the law of dissociative variation); (2) Alleles are passed on independently to offspring (the law of independent variation). Therefore, the MR Results are less likely to be influenced by the environment and confound the relationship of the estimates. |
|  | **METHODS** |  |  |  |
| 4 | **Study design and data sources** | Present key elements of the study design early in the article. Consider including a table listing sources of data for all phases of the study. For each data source contributing to the analysis, describe the following: |  |  |
|  | a) | Setting: Describe the study design and the underlying population, if possible. Describe the setting, locations, and relevant dates, including periods of recruitment, exposure, follow-up, and data collection, when available. | 3-4 and Table 1 | Detailed information on the study population, study design and genetic data can be found in the original studies (listed in Table 1). |
|  | b) | Participants: Give the eligibility criteria, and the sources and methods of selection of participants. Report the sample size, and whether any power or sample size calculations were carried out prior to the main analysis | 3-4 and Table 1 | Detailed information on the study population, study design and genetic data can be found in the original studies (listed in Table 1). |
|  | c) | Describe measurement, quality control and selection of genetic variants | 3-4 and Table 1 | Detailed information on the study population, study design and genetic data can be found in the original studies (listed in Table 1). |
|  | d) | For each exposure, outcome, and other relevant variables, describe methods of assessment and diagnostic criteria for diseases | 3-4 and Table 1 | Detailed information on the study population, study design and genetic data can be found in the original studies (listed in Table 1). |
|  | e) | Provide details of ethics committee approval and participant informed consent, if relevant | 3 | Genetic variants in this study were obtained from existing, publicly published GWASs studies which had received ethical approval and informed consent. |
| 5 | **Assumptions** | Explicitly state the three core IV assumptions for the main analysis (relevance, independence and exclusion restriction) as well assumptions for any additional or sensitivity analysis | 4-5 | The criteria for selecting IVs were as follows: (1) the IVs should be associated with the exposure; (2) the IVs can only affect the outcome through the exposure; and (3) the IVs should be independent of confounders of the exposure-outcome association. |
| 6 | **Statistical methods: main analysis** | Describe statistical methods and statistics used |  |  |
|  | a) | Describe how quantitative variables were handled in the analyses (i.e., scale, units, model) | Not Applicable. |  |
|  | b) | Describe how genetic variants were handled in the analyses and, if applicable, how their weights were selected | 4-5 | (1) SNPs from gut microbiota with a threshold of 1×10-5 for p-value were selected as potential IVs; (2) 1000 Genomes project European samples data were used as the reference panel to calculate the linkage disequilibrium (LD) between the SNPs, and r2<0.1 (clumping window size=500 kb) was set to avoid LD. |
|  | c) | Describe the MR estimator (e.g. two-stage least squares, Wald ratio) and related statistics. Detail the included covariates and, in case of two-sample MR, whether the same covariate set was used for adjustment in the two samples | 5 | Detailed information can be found in the original studies. |
|  | d) | Explain how missing data were addressed | 3 | Detailed information on the study population, study design and genetic data can be found in the original studies (listed in Table 1). |
|  | e) | If applicable, indicate how multiple testing was addressed | 5 | Multiple-testing significance threshold (P < 0.05/n) were used at each feature level (where n is the effective number of independent bacterial taxa on the corresponding taxonomic level). |
| 7 | **Assessment of assumptions** | Describe any methods or prior knowledge used to assess the assumptions or justify their validity | 5 and Figure 1 | In MR-Egger regression analysis, the intercept was estimated as an indicator of average pleiotropic bias, which could test the independence assumption. MR-PRESSO was used to evaluate horizontal pleiotropy and it also corrected for horizontal pleiotropy by removing outliers. |
| 8 | **Sensitivity analyses and additional analyses** | Describe any sensitivity analyses or additional analyses performed (e.g. comparison of effect estimates from different approaches, independent replication, bias analytic techniques, validation of instruments, simulations) | 5 | Weighted mode method, weighted median method, MR-Egger regression, and MR-PRESSO were used for sensitivity analyses. To identify potential heterogeneous SNPs, Cochran's Q statistic and the “leave-one-out” analysis were performed by omitting each instrumental SNP in turn |
| 9 | **Software and pre-registration** |  |  |  |
|  | a) | Name statistical software and package(s), including version and settings used | 5 | All statistical analyses were performed using R software (version 4.3.2). R packages included TwosampleMR (version 0.5.6) and MR-PRESSO (version 1.0). |
|  | b) | State whether the study protocol and details were pre-registered (as well as when and where) | Not Applicable. | Genetic variants in this study were obtained from existing, publicly published GWASs studies which had received ethical approval and informed consent. |
|  | **RESULTS** |  |  |  |
| 10 | **Descriptive data** |  |  |  |
|  | a) | Report the numbers of individuals at each stage of included studies and reasons for exclusion. Consider use of a flow diagram | 3-4 and Table 1 | Detailed information on the study population, study design and genetic data can be found in the original studies (listed in Table 1). |
|  | b) | Report summary statistics for phenotypic exposure(s), outcome(s), and other relevant variables (e.g. means, SDs, proportions) | 3-4 | Detailed information can be found in the manuscript (2.2 Data sources). |
|  | c) | If the data sources include meta-analyses of previous studies, provide the assessments of heterogeneity across these studies | 3 | Detailed information on the study population, study design and genetic data can be found in the original studies (listed in Table 1). |
|  | d) | For two-sample MR:  i.  Provide justification of the similarity of the genetic variant-exposure associations between the exposure and outcome samples  ii.  Provide information on the number of individuals who overlap between the exposure and outcome studies | 3 | GWAS sample populations included in this study were mainly European and largely independent of each other. |
| 11 | **Main results** |  |  |  |
|  | a) | Report the associations between genetic variant and exposure, and between genetic variant and outcome, preferably on an interpretable scale | Table 1 | Detailed information can be found in Table 1. |
|  | b) | Report MR estimates of the relationship between exposure and outcome, and the measures of uncertainty from the MR analysis, on an interpretable scale, such as odds ratio or relative risk per SD difference | 5-9 | Detailed information can be found in the manuscript (3 Result). |
|  | c) | If relevant, consider translating estimates of relative risk into absolute risk for a meaningful time period | Not Applicable. |  |
|  | d) | Consider plots to visualize results (e.g. forest plot, scatterplot of associations between genetic variants and outcome versus between genetic variants and exposure) | Appendix 2-3 | Additional visualizations of the results, including leave-one-out plot can be found in Appendix 2-3. |
| 12 | **Assessment of assumptions** |  |  |  |
|  | a) | Report the assessment of the validity of the assumptions | 7-9, Table2-3 and TableS2-S4 | The sensitivity analyses showed there were no potential horizontal pleiotropy (all P for Egger intercept > 0.05; all P for PRESSSO global test > 0.05). Heterogeneity was not found among SNPs (all P for Cochran’s Q > 0.05). |
|  | b) | Report any additional statistics (e.g., assessments of heterogeneity across genetic variants, such as *I2*, Q statistic or E-value) | 7-9, Table2-3 and TableS2-S4 | The sensitivity analyses showed there were no potential horizontal pleiotropy (all P for Egger intercept > 0.05; all P for PRESSSO global test > 0.05). Heterogeneity was not found among SNPs (all P for Cochran’s Q > 0.05). |
| 13 | **Sensitivity analyses and additional analyses** |  |  |  |
|  | a) | Report any sensitivity analyses to assess the robustness of the main results to violations of the assumptions | 7-9, Table2-3 and TableS2-S4 | The sensitivity analyses showed there were no potential horizontal pleiotropy (all P for Egger intercept > 0.05; all P for PRESSSO global test > 0.05). Heterogeneity was not found among SNPs (all P for Cochran’s Q > 0.05). |
|  | b) | Report results from other sensitivity analyses or additional analyses | Appendix 2-3 | The results were robust after leave-one-out. |
|  | c) | Report any assessment of direction of causal relationship (e.g., bidirectional MR) | 5-7 | Detailed information can be found in the manuscript (3 Result). |
|  | d) | When relevant, report and compare with estimates from non-MR analyses | 10-11 | The results of IVW analyses showed that the gut microbiota had a causal contribution to urticaria and SCFAs were associated with the pathogenesis of it, which was consistent with evidence from animal experiment (PMID: 38168034) . |
|  | e) | Consider additional plots to visualize results (e.g., leave-one-out analyses) | Appendix 2-3 | Additional visualizations of the results, including leave-one-out plot can be found in Appendix 2-3. |
|  | **DISCUSSION** |  |  |  |
| 14 | **Key results** | Summarize key results with reference to study objectives | 10 | In our study, we revealed 21 taxa that were negatively associated with different subtypes of urticaria, and 14 taxa that were positively associated with urticaria, but none of these associations reached statistical significance after correction for rigorous multiple testing. Furthermore, through multiplex analyses, this study found complex interactions between gut microbiota and SCFAs. SCFAs (especially acetic acid) may provide potential protection against urticaria by changing intestinal flora and directly interacting with the host. |
| 15 | **Limitations** | Discuss limitations of the study, taking into account the validity of the IV assumptions, other sources of potential bias, and imprecision. Discuss both direction and magnitude of any potential bias and any efforts to address them | 13 | several limitations must be acknowledged: ①… ②… ③... ④... |
| 16 | **Interpretation** |  |  |  |
|  | a) | Meaning: Give a cautious overall interpretation of results in the context of their limitations and in comparison with other studies | 10-11 | Echoing the existing literature, this study deepens…  However, there are some inconsistencies between our results and existing evidence due to the complexity of the intestinal microbiota. For example, previous research…  Gut metabolites are one of the key mediators of the interplay between the gut microbiota and the host…(the part of “Comparison with existing evidence” in discussion) |
|  | b) | Mechanism: Discuss underlying biological mechanisms that could drive a potential causal relationship between the investigated exposure and the outcome, and whether the gene-environment equivalence assumption is reasonable. Use causal language carefully, clarifying that IV estimates may provide causal effects only under certain assumptions | 11-12 | …. This seemingly paradoxical result actually reveals the complex regulatory mechanisms within the gut environment. The effects produced by the gut microbiota exceed the scope of their metabolites such as acetate….  …The traditional view is that the intestinal microbiota alleviates inflammatory skin diseases through metabolites such as acetate [12], but it ignores the bidirectional nature of interactions in organisms. … (the part of “Cross talk between gut microbiota and SCFAs in urticaria” in discussion) |
|  | c) | Clinical relevance: Discuss whether the results have clinical or public policy relevance, and to what extent they inform effect sizes of possible interventions | 12 | ….when designing interventions targeting the gut microbiome, these complex interactions must be considered to maximize the potential of the gut microbiota in preventing and treating inflammatory skin diseases…(the part of “Cross talk between gut microbiota and SCFAs in urticaria” in discussion) |
| 17 | **Generalizability** | Discuss the generalizability of the study results (a) to other populations, (b) across other exposure periods/timings, and (c) across other levels of exposure | 12 | Given that GWAS data for both exposure and outcome primarily come from European populations, this restricts the possibility of generalizing our findings to other ethnic groups. |
|  | **OTHER INFORMATION** |  |  |  |
| 18 | **Funding** | Describe sources of funding and the role of funders in the present study and, if applicable, sources of funding for the databases and original study or studies on which the present study is based | 14 | Funding |
| 19 | **Data and data sharing** | Provide the data used to perform all analyses or report where and how the data can be accessed, and reference these sources in the article. Provide the statistical code needed to reproduce the results in the article, or report whether the code is publicly accessible and if so, where | 14 | Data availability |
| 20 | **Conflicts of Interest** | All authors should declare all potential conflicts of interest | 14 | Conflicts of Interest |

This checklist is copyrighted by the Equator Network under the Creative Commons Attribution 3.0 Unported (CC BY 3.0) license.

1. Skrivankova VW, Richmond RC, Woolf BAR, Yarmolinsky J, Davies NM, Swanson SA, et al. Strengthening the Reporting of Observational Studies in Epidemiology using Mendelian Randomization (STROBE-MR) Statement. JAMA. 2021;under review.

2. Skrivankova VW, Richmond RC, Woolf BAR, Davies NM, Swanson SA, VanderWeele TJ, et al. Strengthening the Reporting of Observational Studies in Epidemiology using Mendelian Randomisation (STROBE-MR): Explanation and Elaboration. BMJ. 2021;375:n2233.

Table S1 Significant MR results of causal effect between gut microbiota and urticaria

| **outcome** | **exposure** | **method** | **nsnp** | **b** | **se** | **lo_ci** | **up_ci** | **or** | **or_lci95** | **or_uci95** | **P value** | **egger_intercept** | **egger se** | **egger p value** |
| --- | --- | --- | --- | --- | --- | --- | --- | --- | --- | --- | --- | --- | --- | --- |
| Dermatographic urticaria | family.Alcaligenaceae. | MR Egger | 14 | -0.92036 | 1.182277 | -3.23762 | 1.396904 | 0.398376 | 0.039257 | 4.042664 | 0.45 | 0.02172679 | 0.076361 | 0.780858 |
| Weighted median | -0.34308 | 0.357234 | -1.04326 | 0.357104 | 0.709585 | 0.352306 | 1.429184 | 0.34 |
| Inverse variance weighted | -0.59373 | 0.272548 | -1.12793 | -0.05954 | 0.552262 | 0.323704 | 0.942199 | 2.90E-02 |
| Simple mode | 0.035067 | 0.610569 | -1.16165 | 1.231781 | 1.035689 | 0.31297 | 3.427328 | 0.96 |
| Weighted mode | -0.06347 | 0.609044 | -1.2572 | 1.130252 | 0.938499 | 0.28445 | 3.096437 | 0.92 |
| Urticaria due to cold and heat | class.Gammaproteobacteria. | MR Egger | 6 | -1.49361 | 3.306922 | -7.97518 | 4.987958 | 0.224561 | 0.000344 | 146.6367 | 0.67 | 0.3239335 | 0.241793 | 0.251386 |
| Weighted median | 1.78553 | 1.433898 | -1.02491 | 4.595971 | 5.962742 | 0.358829 | 99.08434 | 0.21 |
| Inverse variance weighted | 2.690303 | 1.087534 | 0.558736 | 4.82187 | 14.73614 | 1.748461 | 124.1971 | 1.30E-02 |
| Simple mode | 1.667961 | 2.002295 | -2.25654 | 5.592459 | 5.301347 | 0.104712 | 268.3949 | 0.44 |
| Weighted mode | 1.472958 | 1.832528 | -2.1188 | 5.064712 | 4.362119 | 0.120176 | 158.3348 | 0.46 |
| order.Burkholderiales. | MR Egger | 10 | -2.00205 | 2.580051 | -7.05895 | 3.054851 | 0.135058 | 0.00086 | 21.21802 | 0.46 | 0.01447258 | 0.180277 | 0.937987 |
| Weighted median | -1.04143 | 1.096965 | -3.19148 | 1.108619 | 0.352949 | 0.041111 | 3.03017 | 0.34 |
| Inverse variance weighted | -1.8056 | 0.817972 | -3.40882 | -0.20237 | 0.164376 | 0.03308 | 0.816791 | 2.70E-02 |
| Simple mode | -0.63793 | 1.71383 | -3.99703 | 2.72118 | 0.528387 | 0.01837 | 15.19824 | 0.72 |
| Weighted mode | -0.77723 | 1.5871 | -3.88794 | 2.333489 | 0.459679 | 0.020487 | 10.31386 | 0.64 |
| family.Defluviitaleaceae. | MR Egger | 12 | 1.31745 | 1.964373 | -2.53272 | 5.167621 | 3.733887 | 0.079443 | 175.4968 | 0.52 | 0.00728376 | 0.195652 | 0.971036 |
| Weighted median | 1.17239 | 0.749258 | -0.29616 | 2.640936 | 3.229703 | 0.743672 | 14.02632 | 0.12 |
| Inverse variance weighted | 1.38754 | 0.559359 | 0.291196 | 2.483883 | 4.004984 | 1.338026 | 11.98773 | 1.30E-02 |
| Simple mode | 0.532796 | 1.209441 | -1.83771 | 2.903301 | 1.70369 | 0.159182 | 18.23424 | 0.67 |
| Weighted mode | 1.123307 | 1.143794 | -1.11853 | 3.365143 | 3.075005 | 0.32676 | 28.93762 | 0.35 |
| family.Rhodospirillaceae. | MR Egger | 15 | 0.403872 | 2.012579 | -3.54078 | 4.348528 | 1.497613 | 0.028991 | 77.36448 | 0.84 | 0.06093735 | 0.199555 | 0.764921 |
| Weighted median | 0.843565 | 0.642569 | -0.41587 | 2.103 | 2.32464 | 0.659766 | 8.190705 | 0.19 |
| Inverse variance weighted | 1.001063 | 0.475274 | 0.069526 | 1.932601 | 2.721174 | 1.072 | 6.90745 | 3.50E-02 |
| Simple mode | 1.336622 | 1.162024 | -0.94095 | 3.614189 | 3.806165 | 0.390259 | 37.12124 | 0.27 |
| Weighted mode | 1.132194 | 0.998236 | -0.82435 | 3.088735 | 3.102455 | 0.438521 | 21.9493 | 0.28 |
| genus.DefluviitaleaceaeUCG011. | MR Egger | 10 | 1.495666 | 2.328198 | -3.0676 | 6.058933 | 4.462307 | 0.046533 | 427.9187 | 0.54 | 0.02857315 | 0.227211 | 0.903028 |
| Weighted median | 1.536405 | 0.805242 | -0.04187 | 3.114679 | 4.647851 | 0.958995 | 22.5262 | 0.06 |
| Inverse variance weighted | 1.777916 | 0.619027 | 0.564623 | 2.99121 | 5.917514 | 1.758784 | 19.90976 | 4.10E-03 |
| Simple mode | 1.308615 | 1.27445 | -1.18931 | 3.806537 | 3.701043 | 0.304432 | 44.99434 | 0.33 |
| Weighted mode | 1.453712 | 1.230317 | -0.95771 | 3.865134 | 4.278967 | 0.383771 | 47.70965 | 0.27 |
| genus.Desulfovibrio. | MR Egger | 11 | -1.63072 | 1.82462 | -5.20698 | 1.945534 | 0.195788 | 0.005478 | 6.997369 | 0.39 | 0.03158021 | 0.180556 | 0.865025 |
| Weighted median | -1.08667 | 0.752684 | -2.56193 | 0.388595 | 0.337339 | 0.077156 | 1.474908 | 0.15 |
| Inverse variance weighted | -1.21513 | 0.613501 | -2.41759 | -0.01267 | 0.296671 | 0.089136 | 0.987409 | 4.80E-02 |
| Simple mode | -0.70066 | 1.26606 | -3.18214 | 1.780818 | 0.496258 | 0.041497 | 5.93471 | 0.59 |
| Weighted mode | -1.1203 | 1.153664 | -3.38148 | 1.140878 | 0.326181 | 0.033997 | 3.129514 | 0.35 |
| genus.Flavonifractor. | MR Egger | 6 | 2.427176 | 3.653644 | -4.73397 | 9.588318 | 11.32685 | 0.008792 | 14593.3 | 0.54 | -0.3726903 | 0.291666 | 0.270439 |
| Weighted median | -0.82643 | 1.154171 | -3.0886 | 1.435746 | 0.437609 | 0.045565 | 4.202779 | 0.47 |
| Inverse variance weighted | -2.10618 | 0.90871 | -3.88725 | -0.32511 | 0.121702 | 0.020502 | 0.722448 | 2.00E-02 |
| Simple mode | -0.69406 | 1.64464 | -3.91756 | 2.529433 | 0.499543 | 0.01989 | 12.54638 | 0.69 |
| Weighted mode | -0.65095 | 1.498012 | -3.58705 | 2.285157 | 0.521552 | 0.02768 | 9.827231 | 0.68 |
| genus.RikenellaceaeRC9gutgroup. | MR Egger | 13 | -1.33435 | 2.100008 | -5.45037 | 2.781664 | 0.263329 | 0.004295 | 16.14587 | 0.54 | 0.08040467 | 0.281861 | 0.780742 |
| Weighted median | -0.57248 | 0.430578 | -1.41641 | 0.271454 | 0.564126 | 0.242583 | 1.31187 | 0.18 |
| Inverse variance weighted | -0.74314 | 0.338662 | -1.40692 | -0.07937 | 0.475616 | 0.244896 | 0.923701 | 2.80E-02 |
| Simple mode | -0.45607 | 0.676087 | -1.7812 | 0.86906 | 0.633769 | 0.168435 | 2.384668 | 0.51 |
| Weighted mode | -0.44599 | 0.710242 | -1.83806 | 0.946089 | 0.640193 | 0.159126 | 2.575616 | 0.54 |
| genus.Ruminococcus1. | MR Egger | 10 | -0.77161 | 2.003349 | -4.69818 | 3.15495 | 0.462267 | 0.009112 | 23.45187 | 0.71 | -0.0595119 | 0.15491 | 0.710861 |
| Weighted median | -1.55569 | 1.045711 | -3.60528 | 0.493906 | 0.211044 | 0.02718 | 1.638704 | 0.14 |
| Inverse variance weighted | -1.48502 | 0.751618 | -2.95819 | -0.01185 | 0.226498 | 0.051913 | 0.988221 | 4.80E-02 |
| Simple mode | -3.15838 | 1.660693 | -6.41334 | 0.096575 | 0.042494 | 0.00164 | 1.101392 | 0.09 |
| Weighted mode | -2.86038 | 1.542784 | -5.88424 | 0.163472 | 0.057247 | 0.002783 | 1.177593 | 0.1 |
| genus.Terrisporobacter. | MR Egger | 5 | -3.21269 | 2.399743 | -7.91618 | 1.490809 | 0.040248 | 0.000365 | 4.440686 | 0.27 | 0.1304429 | 0.236823 | 0.620132 |
| Weighted median | -1.63902 | 1.029412 | -3.65667 | 0.378626 | 0.19417 | 0.025818 | 1.460277 | 0.11 |
| Inverse variance weighted | -1.96463 | 0.790266 | -3.51355 | -0.4157 | 0.140208 | 0.029791 | 0.659875 | 1.30E-02 |
| Simple mode | -1.1696 | 1.383822 | -3.8819 | 1.542688 | 0.31049 | 0.020612 | 4.677144 | 0.45 |
| Weighted mode | -1.18915 | 1.254995 | -3.64894 | 1.270636 | 0.304479 | 0.026019 | 3.563118 | 0.4 |
| genus.Veillonella. | MR Egger | 6 | 0.044625 | 6.535885 | -12.7657 | 12.85496 | 1.045635 | 2.86E-06 | 382682 | 0.99 | -0.153175 | 0.496166 | 0.772947 |
| Weighted median | -1.80269 | 1.046015 | -3.85288 | 0.247504 | 0.164856 | 0.021219 | 1.280825 | 0.08 |
| Inverse variance weighted | -1.95706 | 0.823142 | -3.57042 | -0.3437 | 0.141273 | 0.028144 | 0.709142 | 1.70E-02 |
| Simple mode | -1.45667 | 1.416725 | -4.23345 | 1.320113 | 0.233011 | 0.014502 | 3.743845 | 0.35 |
| Weighted mode | -1.5674 | 1.398164 | -4.3078 | 1.173005 | 0.208588 | 0.013463 | 3.231689 | 0.31 |
| Spontaneous urticaria | phylum.Actinobacteria. | MR Egger | 19 | 0.115162 | 0.4332 | -0.73391 | 0.964234 | 1.122055 | 0.480028 | 2.622779 | 0.79 | 0.00678907 | 0.027387 | 0.807185 |
| Weighted median | 0.135455 | 0.148149 | -0.15492 | 0.425826 | 1.145058 | 0.856487 | 1.530855 | 0.36 |
| Inverse variance weighted | 0.219124 | 0.108546 | 0.006374 | 0.431874 | 1.244986 | 1.006395 | 1.540141 | 4.40E-02 |
| Simple mode | 0.195846 | 0.249744 | -0.29365 | 0.685345 | 1.216339 | 0.745535 | 1.984456 | 0.44 |
| Weighted mode | 0.162523 | 0.205684 | -0.24062 | 0.565664 | 1.176475 | 0.786142 | 1.760616 | 0.44 |
| class.Betaproteobacteria. | MR Egger | 11 | -0.10299 | 0.512114 | -1.10673 | 0.900759 | 0.90214 | 0.330638 | 2.461469 | 0.85 | -0.0171589 | 0.034766 | 0.633444 |
| Weighted median | -0.19589 | 0.203214 | -0.59419 | 0.20241 | 0.822104 | 0.552011 | 1.22435 | 0.34 |
| Inverse variance weighted | -0.34412 | 0.147595 | -0.6334 | -0.05483 | 0.708846 | 0.530783 | 0.946644 | 2.00E-02 |
| Simple mode | -0.0586 | 0.312762 | -0.67161 | 0.554413 | 0.943084 | 0.510884 | 1.740919 | 0.86 |
| Weighted mode | -0.07695 | 0.302577 | -0.67 | 0.516103 | 0.925939 | 0.51171 | 1.675485 | 0.8 |
| order.Bifidobacteriales. | MR Egger | 21 | -0.02723 | 0.298671 | -0.61262 | 0.558169 | 0.973142 | 0.541929 | 1.74747 | 0.93 | 0.01801559 | 0.021984 | 0.422673 |
| Weighted median | 0.116128 | 0.119676 | -0.11844 | 0.350693 | 1.12314 | 0.888309 | 1.420051 | 0.33 |
| Inverse variance weighted | 0.206802 | 0.08745 | 0.035399 | 0.378205 | 1.229739 | 1.036033 | 1.459662 | 1.80E-02 |
| Simple mode | 0.22782 | 0.197545 | -0.15937 | 0.615008 | 1.255859 | 0.852682 | 1.849671 | 0.26 |
| Weighted mode | 0.122076 | 0.162867 | -0.19714 | 0.441294 | 1.12984 | 0.821073 | 1.554718 | 0.46 |
| family.Bifidobacteriaceae. | MR Egger | 21 | -0.02723 | 0.298671 | -0.61262 | 0.558169 | 0.973142 | 0.541929 | 1.74747 | 0.93 | 0.01801559 | 0.021984 | 0.422673 |
| Weighted median | 0.116128 | 0.123889 | -0.12669 | 0.358951 | 1.12314 | 0.881003 | 1.431827 | 0.35 |
| Inverse variance weighted | 0.206802 | 0.08745 | 0.035399 | 0.378205 | 1.229739 | 1.036033 | 1.459662 | 1.80E-02 |
| Simple mode | 0.22782 | 0.207361 | -0.17861 | 0.634247 | 1.255859 | 0.836434 | 1.885601 | 0.28 |
| Weighted mode | 0.122076 | 0.155697 | -0.18309 | 0.427242 | 1.12984 | 0.832693 | 1.533023 | 0.44 |
| family.Defluviitaleaceae. | MR Egger | 12 | 0.026727 | 0.419692 | -0.79587 | 0.849323 | 1.027087 | 0.451189 | 2.338063 | 0.95 | 0.02542152 | 0.041848 | 0.557082 |
| Weighted median | 0.187862 | 0.14592 | -0.09814 | 0.473866 | 1.206667 | 0.90652 | 1.606192 | 0.2 |
| Inverse variance weighted | 0.271082 | 0.116226 | 0.043278 | 0.498886 | 1.311383 | 1.044228 | 1.646886 | 2.00E-02 |
| Simple mode | -0.06008 | 0.279963 | -0.60881 | 0.488647 | 0.941689 | 0.544 | 1.63011 | 0.83 |
| Weighted mode | -0.06488 | 0.270447 | -0.59495 | 0.465201 | 0.937184 | 0.551589 | 1.592335 | 0.81 |
| genus.Alloprevotella. | MR Egger | 6 | 0.071985 | 0.798329 | -1.49274 | 1.636709 | 1.074639 | 0.224756 | 5.138232 | 0.93 | -0.0339839 | 0.111246 | 0.775234 |
| Weighted median | -0.17864 | 0.105545 | -0.38551 | 0.028232 | 0.83641 | 0.680107 | 1.028634 | 0.09 |
| Inverse variance weighted | -0.17048 | 0.085782 | -0.33862 | -0.00235 | 0.843257 | 0.712756 | 0.997651 | 4.70E-02 |
| Simple mode | -0.22644 | 0.162462 | -0.54486 | 0.091988 | 0.797369 | 0.579922 | 1.096352 | 0.22 |
| Weighted mode | -0.22049 | 0.149639 | -0.51378 | 0.0728 | 0.802124 | 0.598228 | 1.075515 | 0.2 |
| genus.Anaerostipes. | MR Egger | 13 | -0.36623 | 0.575231 | -1.49368 | 0.761223 | 0.693343 | 0.224544 | 2.140894 | 0.54 | -0.0007789 | 0.036569 | 0.983387 |
| Weighted median | -0.46547 | 0.203486 | -0.8643 | -0.06663 | 0.627842 | 0.421347 | 0.935538 | 2.20E-02 |
| Inverse variance weighted | -0.37801 | 0.152055 | -0.67603 | -0.07998 | 0.685227 | 0.508631 | 0.923136 | 1.30E-02 |
| Simple mode | -0.49032 | 0.328481 | -1.13414 | 0.153504 | 0.612431 | 0.321698 | 1.165913 | 0.16 |
| Weighted mode | -0.45462 | 0.322949 | -1.0876 | 0.178361 | 0.63469 | 0.337025 | 1.195257 | 0.18 |
| genus.DefluviitaleaceaeUCG011. | MR Egger | 10 | 0.264088 | 0.472653 | -0.66231 | 1.190488 | 1.302243 | 0.515658 | 3.288684 | 0.59 | 0.01117472 | 0.046218 | 0.815031 |
| Weighted median | 0.382633 | 0.159026 | 0.070943 | 0.694323 | 1.46614 | 1.07352 | 2.002354 | 1.60E-02 |
| Inverse variance weighted | 0.374225 | 0.119329 | 0.14034 | 0.608111 | 1.453865 | 1.150665 | 1.836957 | 1.70E-03 |
| Simple mode | 0.383843 | 0.285238 | -0.17522 | 0.94291 | 1.467915 | 0.83927 | 2.567442 | 0.21 |
| Weighted mode | 0.417712 | 0.248519 | -0.06938 | 0.904809 | 1.518484 | 0.932968 | 2.471459 | 0.13 |
| genus.Intestinibacter. | MR Egger | 15 | 0.092669 | 0.343961 | -0.58149 | 0.766832 | 1.097099 | 0.559063 | 2.152935 | 0.79 | 0.01098739 | 0.027439 | 0.695339 |
| Weighted median | 0.24799 | 0.140688 | -0.02776 | 0.523738 | 1.281447 | 0.972624 | 1.688327 | 0.08 |
| Inverse variance weighted | 0.223746 | 0.105649 | 0.016674 | 0.430818 | 1.250753 | 1.016814 | 1.538516 | 3.40E-02 |
| Simple mode | 0.303025 | 0.2464 | -0.17992 | 0.785969 | 1.353948 | 0.835338 | 2.194532 | 0.24 |
| Weighted mode | 0.286855 | 0.263001 | -0.22863 | 0.802337 | 1.332231 | 0.795625 | 2.230748 | 0.29 |
| genus.LachnospiraceaeUCG010. | MR Egger | 10 | -0.07988 | 0.431321 | -0.92526 | 0.765514 | 0.923232 | 0.396427 | 2.150099 | 0.86 | -0.0255682 | 0.033017 | 0.460965 |
| Weighted median | -0.2773 | 0.190375 | -0.65043 | 0.095836 | 0.757828 | 0.52182 | 1.100578 | 0.15 |
| Inverse variance weighted | -0.3954 | 0.141532 | -0.6728 | -0.11799 | 0.673413 | 0.510278 | 0.888702 | 5.20E-03 |
| Simple mode | -0.16704 | 0.33737 | -0.82829 | 0.494204 | 0.846165 | 0.436798 | 1.639192 | 0.63 |
| Weighted mode | -0.14931 | 0.289906 | -0.71752 | 0.41891 | 0.861305 | 0.48796 | 1.520303 | 0.62 |

Abbreviations: snp, single-nucleotide polymorphisms; MR, Mendelian Randomization; b, beta; se, standard error; lo ci, lower confidence interval; up ci upper confidence interval; or, odds ratio; or lci95, lower confidence interval of odds ratio; or uci95, upper confidence interval of odds ratio

Table S2 Horizontal pleiotropy and sensitivity analysis of forward Mendelian randomization(gut microbiota to urticaria)

| **outcome** | **exposure** | **method** | **Causal Estimate** | **Sd** | **T-stat** | **P-value** | **Residual sum of squares** | **Global Test P value** | **method** | **Q** | **Q_df** | **Q_pval** |
| --- | --- | --- | --- | --- | --- | --- | --- | --- | --- | --- | --- | --- |
| Dermatographic urticaria | family.Alcaligenaceae. | Raw | -0.5937322 | 0.272548 | -2.17845 | 0.048372 | 16.16646 | 0.397 | MR Egger | 13.92177 | 12 | 0.305732 |
| Outlier-corrected | NA | NA | NA | NA | IVW | 14.01569 | 13 | 0.37274 |
| Temperature-Triggered Urticaria (Urticaria due to cold and heat) | class.Gammaproteobacteria. | Raw | 2.690302 | 0.92849 | 2.897501 | 0.033889 | 5.377303 | 0.655 | MR Egger | 1.849672 | 4 | 0.763383 |
| Outlier-corrected | NA | NA | NA | NA | IVW | 3.644513 | 5 | 0.601642 |
| order.Burkholderiales. | Raw | -1.805597 | 0.554995 | -3.25336 | 0.009944 | 5.300461 | 0.908 | MR Egger | 4.136817 | 8 | 0.844573 |
| Outlier-corrected | NA | NA | NA | NA | IVW | 4.143262 | 9 | 0.901733 |
| family.Defluviitaleaceae. | Raw | 1.387538 | 0.441661 | 3.141638 | 0.009381 | 8.137662 | 0.819 | MR Egger | 6.856479 | 10 | 0.738921 |
| Outlier-corrected | NA | NA | NA | NA | IVW | 6.857865 | 11 | 0.810474 |
| family.Rhodospirillaceae. | Raw | 1.001064 | 0.395951 | 2.52825 | 0.024113 | 11.09535 | 0.809 | MR Egger | 9.623542 | 13 | 0.724391 |
| Outlier-corrected | NA | NA | NA | NA | IVW | 9.716791 | 14 | 0.782582 |
| genus.DefluviitaleaceaeUCG011. | Raw | 1.777916 | 0.437526 | 4.063569 | 0.002827 | 5.554826 | 0.884 | MR Egger | 4.480229 | 8 | 0.811408 |
| Outlier-corrected | NA | NA | NA | NA | IVW | 4.496043 | 9 | 0.875845 |
| genus.Desulfovibrio. | Raw | -1.208496 | 0.349684 | -3.45597 | 0.006164 | 4.064904 | 0.977 | MR Egger | 3.359523 | 9 | 0.948322 |
| Outlier-corrected | NA | NA | NA | NA | IVW | 3.390115 | 10 | 0.970698 |
| genus.Flavonifractor. | Raw | -2.106179 | 0.90871 | -2.31777 | 0.068243 | 7.6073 | 0.442 | MR Egger | 3.783795 | 4 | 0.436056 |
| Outlier-corrected | NA | NA | NA | NA | IVW | 5.416566 | 5 | 0.367182 |
| genus.RikenellaceaeRC9gutgroup. | Raw | -0.7431451 | 0.210952 | -3.52282 | 0.004202 | 5.44457 | 0.961 | MR Egger | 4.574623 | 11 | 0.950008 |
| Outlier-corrected | NA | NA | NA | NA | IVW | 4.655999 | 12 | 0.968494 |
| genus.Ruminococcus1. | Raw | -1.485019 | 0.654611 | -2.26855 | 0.04948 | 8.440148 | 0.672 | MR Egger | 6.679194 | 8 | 0.571607 |
| Outlier-corrected | NA | NA | NA | NA | IVW | 6.826782 | 9 | 0.655148 |
| genus.Terrisporobacter. | Raw | -1.964627 | 0.41737 | -4.70716 | 0.009259 | 1.780394 | 0.889 | MR Egger | 0.812334 | 3 | 0.846515 |
| Outlier-corrected | NA | NA | NA | NA | IVW | 1.11572 | 4 | 0.89177 |
| genus.Veillonella. | Raw | -1.957059 | 0.470103 | -4.16304 | 0.008798 | 2.323146 | 0.992 | MR Egger | 1.535517 | 4 | 0.820332 |
| Outlier-corrected | NA | NA | NA | NA | IVW | 1.630823 | 5 | 0.897497 |
| Spontaneous urticaria | phylum.Actinobacteria. | Raw | 0.2191243 | 0.081738 | 2.680822 | 0.01526 | 11.15092 | 0.935 | MR Egger | 10.14538 | 17 | 0.897403 |
| Outlier-corrected | NA | NA | NA | NA | IVW | 10.20683 | 18 | 0.924946 |
| class.Betaproteobacteria. | Raw | -0.3441173 | 0.147595 | -2.3315 | 0.041943 | 12.48574 | 0.414 | MR Egger | 10.08512 | 9 | 0.343639 |
| Outlier-corrected | NA | NA | NA | NA | IVW | 10.35808 | 10 | 0.409659 |
| order.Bifidobacteriales. | Raw | 0.2068021 | 0.076106 | 2.717279 | 0.013266 | 16.41377 | 0.791 | MR Egger | 14.47617 | 19 | 0.75526 |
| Outlier-corrected | NA | NA | NA | NA | IVW | 15.14771 | 20 | 0.767894 |
| family.Bifidobacteriaceae. | Raw | 0.2068021 | 0.076106 | 2.717279 | 0.013266 | 16.41377 | 0.784 | MR Egger | 14.47617 | 19 | 0.75526 |
| Outlier-corrected | NA | NA | NA | NA | IVW | 15.14771 | 20 | 0.767894 |
| family.Defluviitaleaceae. | Raw | 0.2710816 | 0.116227 | 2.332357 | 0.039704 | 16.91816 | 0.234 | MR Egger | 13.65533 | 10 | 0.189301 |
| Outlier-corrected | NA | NA | NA | NA | IVW | 14.15924 | 11 | 0.224307 |
| genus.Alloprevotella. | Raw | -0.1704842 | 0.050504 | -3.37565 | 0.019768 | 2.499664 | 0.896 | MR Egger | 1.639821 | 4 | 0.801618 |
| Outlier-corrected | NA | NA | NA | NA | IVW | 1.733143 | 5 | 0.884698 |
| genus.Anaerostipes. | Raw | -0.3780055 | 0.152055 | -2.48599 | 0.028642 | 16.6331 | 0.338 | MR Egger | 14.11118 | 11 | 0.226902 |
| Outlier-corrected | NA | NA | NA | NA | IVW | 14.11176 | 12 | 0.293628 |
| genus.DefluviitaleaceaeUCG011. | Raw | 0.3742254 | 0.119329 | 3.136078 | 0.012004 | 12.21609 | 0.395 | MR Egger | 9.917729 | 8 | 0.270848 |
| Outlier-corrected | NA | NA | NA | NA | IVW | 9.990202 | 9 | 0.351279 |
| genus.Intestinibacter. | Raw | 0.2237459 | 0.08511 | 2.628892 | 0.019829 | 10.83023 | 0.818 | MR Egger | 8.925431 | 13 | 0.778552 |
| Outlier-corrected | NA | NA | NA | NA | IVW | 9.085779 | 14 | 0.825517 |
| genus.LachnospiraceaeUCG010. | Raw | -0.3953958 | 0.115467 | -3.42432 | 0.007576 | 7.430163 | 0.757 | MR Egger | 5.390605 | 8 | 0.715128 |
| Outlier-corrected | NA | NA | NA | NA | IVW | 5.990302 | 9 | 0.740889 |

Abbreviations: Sd, standard deviation; T-stat, T-statistic; Q, Cochran’s Q; df, degree of freedom; pval, p value; MR, Mendelian Randomization; IVW, Inverse variance weighted

Table S3 Significant MR results of causal effect between urticaria and gut microbiota

| **outcome** | **exposure** | **method** | **nsnp** | **b** | **se** | **lo_ci** | **up_ci** | **or** | **or_lci95** | **or_uci95** | **P value** | **egger_intercept** | **egger se** | **egger p value** |
| --- | --- | --- | --- | --- | --- | --- | --- | --- | --- | --- | --- | --- | --- | --- |
| phylum.Tenericutes. | Dermatographic urticaria | MR Egger | 12 | -0.03303 | 0.051033 | -0.13306 | 0.066992 | 0.967508 | 0.875416 | 1.069287 | 0.53 | -0.00151 | 0.016124 | 0.927136 |
| Weighted median | -0.05112 | 0.024367 | -0.09888 | -0.00336 | 0.950162 | 0.90585 | 0.996642 | 3.60E-02 |
| Inverse variance weighted | -0.03751 | 0.017977 | -0.07275 | -0.00228 | 0.963184 | 0.929836 | 0.997727 | 3.70E-02 |
| Simple mode | -0.06307 | 0.037362 | -0.1363 | 0.010156 | 0.938874 | 0.872578 | 1.010208 | 0.12 |
| Weighted mode | -0.06043 | 0.036279 | -0.13153 | 0.010678 | 0.941361 | 0.876749 | 1.010735 | 0.12 |
| class.Alphaproteobacteria. | MR Egger | 12 | -0.08741 | 0.056033 | -0.19724 | 0.022413 | 0.916299 | 0.820996 | 1.022666 | 0.15 | 0.013054 | 0.017677 | 0.4772 |
| Weighted median | -0.04279 | 0.027051 | -0.09581 | 0.010229 | 0.958112 | 0.908636 | 1.010282 | 0.11 |
| Inverse variance weighted | -0.04866 | 0.019664 | -0.08721 | -0.01012 | 0.9525 | 0.916488 | 0.989928 | 1.30E-02 |
| Simple mode | -0.03661 | 0.046241 | -0.12725 | 0.054017 | 0.964048 | 0.880517 | 1.055503 | 0.45 |
| Weighted mode | -0.03661 | 0.044017 | -0.12289 | 0.04966 | 0.964048 | 0.884362 | 1.050913 | 0.42 |
| class.Mollicutes. | MR Egger | 12 | -0.03303 | 0.051033 | -0.13306 | 0.066992 | 0.967508 | 0.875416 | 1.069287 | 0.53 | -0.00151 | 0.016124 | 0.927136 |
| Weighted median | -0.05112 | 0.02437 | -0.09889 | -0.00336 | 0.950162 | 0.905844 | 0.996648 | 3.60E-02 |
| Inverse variance weighted | -0.03751 | 0.017977 | -0.07275 | -0.00228 | 0.963184 | 0.929836 | 0.997727 | 3.70E-02 |
| Simple mode | -0.06307 | 0.035448 | -0.13255 | 0.006405 | 0.938874 | 0.875858 | 1.006425 | 0.1 |
| Weighted mode | -0.06043 | 0.035098 | -0.12922 | 0.008364 | 0.941361 | 0.87878 | 1.008399 | 0.11 |
| genus.Coprococcus1. | MR Egger | 13 | -0.0044 | 0.047395 | -0.0973 | 0.088491 | 0.995606 | 0.907285 | 1.092524 | 0.93 | -0.01031 | 0.015035 | 0.507188 |
| Weighted median | -0.00983 | 0.020749 | -0.0505 | 0.030836 | 0.990215 | 0.950753 | 1.031316 | 0.64 |
| Inverse variance weighted | -0.03484 | 0.016222 | -0.06663 | -0.00305 | 0.96576 | 0.935537 | 0.99696 | 3.20E-02 |
| Simple mode | 0.00934 | 0.034651 | -0.05858 | 0.077257 | 1.009384 | 0.943106 | 1.080319 | 0.79 |
| Weighted mode | 0.005919 | 0.032809 | -0.05839 | 0.070224 | 1.005936 | 0.943285 | 1.072748 | 0.86 |
| genus.Marvinbryantia. | MR Egger | 12 | -0.05443 | 0.050033 | -0.15249 | 0.043635 | 0.947025 | 0.858564 | 1.044601 | 0.3 | 0.004346 | 0.015766 | 0.788421 |
| Weighted median | -0.05905 | 0.023897 | -0.10589 | -0.01221 | 0.942658 | 0.899524 | 0.987861 | 1.30E-02 |
| Inverse variance weighted | -0.04152 | 0.017609 | -0.07603 | -0.00701 | 0.95933 | 0.926785 | 0.993019 | 1.80E-02 |
| Simple mode | -0.06332 | 0.035907 | -0.13369 | 0.007059 | 0.938645 | 0.874857 | 1.007084 | 0.11 |
| Weighted mode | -0.06332 | 0.033046 | -0.12809 | 0.001452 | 0.938645 | 0.879777 | 1.001453 | 0.08 |
| class Deltaproteobacteria | Urticaria due to cold and heat | MR Egger | 7 | 0.032452 | 0.019266 | -0.00531 | 0.070213 | 1.032985 | 0.994706 | 1.072736 | 0.15 | -0.01679 | 0.01829 | 0.400841 |
| Weighted median | 0.019681 | 0.008474 | 0.003071 | 0.036291 | 1.019876 | 1.003076 | 1.036957 | 2.00E-02 |
| Inverse variance weighted | 0.01589 | 0.006657 | 0.002842 | 0.028939 | 1.016017 | 1.002846 | 1.029362 | 1.70E-02 |
| Simple mode | 0.024253 | 0.014847 | -0.00485 | 0.053354 | 1.02455 | 0.995164 | 1.054803 | 0.15 |
| Weighted mode | 0.024962 | 0.014172 | -0.00282 | 0.05274 | 1.025276 | 0.997188 | 1.054155 | 0.13 |
| order.Desulfovibrionales. | MR Egger | 7 | 0.031588 | 0.019628 | -0.00688 | 0.070059 | 1.032092 | 0.99314 | 1.072571 | 0.17 | -0.01616 | 0.018634 | 0.425448 |
| Weighted median | 0.020241 | 0.008854 | 0.002888 | 0.037594 | 1.020447 | 1.002892 | 1.03831 | 2.20E-02 |
| Inverse variance weighted | 0.015643 | 0.00673 | 0.002452 | 0.028834 | 1.015766 | 1.002455 | 1.029253 | 2.00E-02 |
| Simple mode | 0.024543 | 0.012933 | -0.00081 | 0.049891 | 1.024847 | 0.999195 | 1.051157 | 0.11 |
| Weighted mode | 0.025086 | 0.013544 | -0.00146 | 0.051633 | 1.025403 | 0.99854 | 1.052989 | 0.11 |
| family.Desulfovibrionaceae. | MR Egger | 7 | 0.031446 | 0.019434 | -0.00665 | 0.069537 | 1.031945 | 0.993376 | 1.072012 | 0.17 | -0.01573 | 0.01845 | 0.432819 |
| Weighted median | 0.0202 | 0.008703 | 0.003142 | 0.037258 | 1.020405 | 1.003147 | 1.03796 | 2.00E-02 |
| Inverse variance weighted | 0.015925 | 0.006649 | 0.002893 | 0.028957 | 1.016053 | 1.002897 | 1.029381 | 1.70E-02 |
| Simple mode | 0.024231 | 0.013805 | -0.00283 | 0.051288 | 1.024527 | 0.997177 | 1.052626 | 0.13 |
| Weighted mode | 0.025139 | 0.013487 | -0.0013 | 0.051573 | 1.025457 | 0.998705 | 1.052926 | 0.11 |
| family.Ruminococcaceae. | MR Egger | 9 | -0.01094 | 0.011425 | -0.03334 | 0.01145 | 0.989116 | 0.967212 | 1.011516 | 0.37 | 0.000601 | 0.012073 | 0.961706 |
| Weighted median | -0.01131 | 0.006496 | -0.02404 | 0.001421 | 0.988752 | 0.976244 | 1.001422 | 0.08 |
| Inverse variance weighted | -0.01044 | 0.005132 | -0.0205 | -0.00038 | 0.989618 | 0.979713 | 0.999623 | 4.20E-02 |
| Simple mode | -0.0112 | 0.010441 | -0.03167 | 0.009264 | 0.988861 | 0.96883 | 1.009307 | 0.31 |
| Weighted mode | -0.01102 | 0.009416 | -0.02947 | 0.007439 | 0.989044 | 0.970959 | 1.007467 | 0.28 |
| genus.Desulfovibrio. | MR Egger | 7 | 0.036965 | 0.028429 | -0.01876 | 0.092687 | 1.037657 | 0.981418 | 1.097118 | 0.25 | -0.00809 | 0.027212 | 0.778192 |
| Weighted median | 0.027097 | 0.0115 | 0.004558 | 0.049637 | 1.027468 | 1.004568 | 1.05089 | 1.80E-02 |
| Inverse variance weighted | 0.029063 | 0.009291 | 0.010853 | 0.047274 | 1.02949 | 1.010912 | 1.048409 | 1.80E-03 |
| Simple mode | 0.047253 | 0.022504 | 0.003146 | 0.09136 | 1.048387 | 1.003151 | 1.095663 | 0.08 |
| Weighted mode | 0.044849 | 0.020964 | 0.00376 | 0.085939 | 1.04587 | 1.003767 | 1.089739 | 0.08 |
| genus.Eisenbergiella. | MR Egger | 6 | -0.0296 | 0.048506 | -0.12467 | 0.065473 | 0.970835 | 0.882787 | 1.067664 | 0.57 | -0.00199 | 0.044534 | 0.966506 |
| Weighted median | -0.03782 | 0.01541 | -0.06802 | -0.00762 | 0.962887 | 0.934238 | 0.992413 | 1.40E-02 |
| Inverse variance weighted | -0.03164 | 0.014403 | -0.05987 | -0.00341 | 0.968852 | 0.941883 | 0.996593 | 2.80E-02 |
| Simple mode | -0.03827 | 0.02443 | -0.08615 | 0.009613 | 0.962454 | 0.917455 | 1.009659 | 0.18 |
| Weighted mode | -0.03827 | 0.019729 | -0.07694 | 0.0004 | 0.962454 | 0.925947 | 1.0004 | 0.11 |
| family.Family XI. | Spontaneous urticaria | MR Egger | 10 | -0.14895 | 0.309193 | -0.75497 | 0.457067 | 0.861611 | 0.470025 | 1.579434 | 0.64 | -0.00129 | 0.047614 | 0.979102 |
| Weighted median | -0.12075 | 0.084624 | -0.28661 | 0.045118 | 0.88626 | 0.750806 | 1.046151 | 0.15 |
| Inverse variance weighted | -0.15711 | 0.066903 | -0.28824 | -0.02598 | 0.854611 | 0.749582 | 0.974356 | 1.90E-02 |
| Simple mode | -0.11157 | 0.136153 | -0.37843 | 0.155289 | 0.894429 | 0.684937 | 1.167995 | 0.43 |
| Weighted mode | -0.10914 | 0.122893 | -0.35002 | 0.131726 | 0.896601 | 0.704677 | 1.140795 | 0.4 |
| genus.Prevotella9. | MR Egger | 14 | 0.007003 | 0.150488 | -0.28795 | 0.301959 | 1.007027 | 0.749797 | 1.352505 | 0.96 | -0.0151 | 0.022993 | 0.523744 |
| Weighted median | -0.06127 | 0.043891 | -0.14729 | 0.024758 | 0.940571 | 0.863041 | 1.025067 | 0.16 |
| Inverse variance weighted | -0.08947 | 0.031942 | -0.15208 | -0.02687 | 0.914414 | 0.858921 | 0.973491 | 5.10E-03 |
| Simple mode | -0.05377 | 0.080248 | -0.21106 | 0.103515 | 0.947648 | 0.809727 | 1.109063 | 0.51 |
| Weighted mode | -0.05377 | 0.077628 | -0.20592 | 0.098379 | 0.947648 | 0.813896 | 1.103381 | 0.5 |

Abbreviations: snp, single-nucleotide polymorphisms; MR, Mendelian Randomization; b, beta; se, standard error; lo ci, lower confidence interval; up ci upper confidence interval; or, odds ratio; or lci95, lower confidence interval of odds ratio; or uci95, upper confidence interval of odds ratio

Table S4 Horizontal pleiotropy and sensitivity analysis of reverse Mendelian randomization(urticaria to gut microbiota)

| **outcome** | **exposure** | **method** | **Causal Estimate** | **Sd** | **T-stat** | **P-value** | **Residual sum of squares** | **Global Test P value** | **method** | **Q** | **Q_df** | **Q_pval** |
| --- | --- | --- | --- | --- | --- | --- | --- | --- | --- | --- | --- | --- |
| phylum.Tenericutes. | Dermatographic urticaria | Raw | -0.03751101 | 0.015087 | -2.48629 | 0.030234 | 9.039436 | 0.774 | MR Egger | 7.738613 | 10 | 0.654352 |
| Outlier-corrected | NA | NA | NA | NA | IVW | 7.747408 | 11 | 0.735736 |
| class.Alphaproteobacteria. | Raw | -0.04866477 | 0.01659 | -2.9333 | 0.01361 | 9.860583 | 0.704 | MR Egger | 7.284501 | 10 | 0.698341 |
| Outlier-corrected | NA | NA | NA | NA | IVW | 7.829846 | 11 | 0.72846 |
| class.Mollicutes. | Raw | -0.03751101 | 0.015087 | -2.48629 | 0.030234 | 9.039436 | 0.764 | MR Egger | 7.738613 | 10 | 0.654352 |
| Outlier-corrected | NA | NA | NA | NA | IVW | 7.747408 | 11 | 0.735736 |
| genus.Coprococcus1. | Raw | -0.03483973 | 0.016222 | -2.14771 | 0.052859 | 17.74748 | 0.273 | MR Egger | 14.13008 | 11 | 0.225879 |
| Outlier-corrected | NA | NA | NA | NA | IVW | 14.73379 | 12 | 0.256319 |
| genus.Marvinbryantia. | Raw | -0.04151978 | 0.014165 | -2.93111 | 0.013663 | 8.238043 | 0.824 | MR Egger | 7.042039 | 10 | 0.72147 |
| Outlier-corrected | NA | NA | NA | NA | IVW | 7.118028 | 11 | 0.789446 |
| class Deltaproteobacteria | Temperature-Triggered Urticaria (Urticaria due to cold and heat) | Raw | 0.0158904 | 0.006657 | 2.38687 | 0.054257 | 9.397361 | 0.4 | MR Egger | 5.646952 | 5 | 0.342101 |
| Outlier-corrected | NA | NA | NA | NA | IVW | 6.598251 | 6 | 0.359602 |
| order.Desulfovibrionales. | Raw | 0.0156427 | 0.00673 | 2.324276 | 0.059102 | 9.567096 | 0.347 | MR Egger | 5.852204 | 5 | 0.320867 |
| Outlier-corrected | NA | NA | NA | NA | IVW | 6.732566 | 6 | 0.346289 |
| family.Desulfovibrionaceae. | Raw | 0.01592529 | 0.006649 | 2.395128 | 0.05365 | 9.340631 | 0.4 | MR Egger | 5.736501 | 5 | 0.332709 |
| Outlier-corrected | NA | NA | NA | NA | IVW | 6.570483 | 6 | 0.362399 |
| family.Ruminococcaceae. | Raw | -0.0104361 | 0.002884 | -3.61853 | 0.006797 | 3.204588 | 0.964 | MR Egger | 2.52368 | 7 | 0.925303 |
| Outlier-corrected | NA | NA | NA | NA | IVW | 2.526156 | 8 | 0.9605 |
| genus.Desulfovibrio. | Raw | 0.02906328 | 0.009291 | 3.128088 | 0.020374 | 11.12911 | 0.307 | MR Egger | 7.896508 | 5 | 0.162032 |
| Outlier-corrected | NA | NA | NA | NA | IVW | 8.0361 | 6 | 0.235471 |
| genus.Eisenbergiella. | Raw | -0.03164352 | 0.014403 | -2.19696 | 0.079398 | 12.01969 | 0.203 | MR Egger | 8.732088 | 4 | 0.068156 |
| Outlier-corrected | NA | NA | NA | NA | IVW | 8.736445 | 5 | 0.12005 |
| family.Family XI. | Spontaneous urticaria | Raw | -0.1571093 | 0.032454 | -4.84096 | 0.00092 | 2.625325 | 0.986 | MR Egger | 2.117082 | 8 | 0.977211 |
| Outlier-corrected | NA | NA | NA | NA | IVW | 2.117812 | 9 | 0.989465 |
| genus.Prevotella9. | Raw | -0.08947233 | 0.031942 | -2.8011 | 0.014998 | 15.42015 | 0.436 | MR Egger | 12.75155 | 12 | 0.387355 |
| Outlier-corrected | NA | NA | NA | NA | IVW | 13.20987 | 13 | 0.431735 |

Abbreviations: Sd, standard deviation; T-stat, T-statistic; Q, Cochran’s Q; df, degree of freedom; pval, p value; MR, Mendelian Randomization; IVW, Inverse variance weighted

Table S5 MR results of causal effect between SCFAs and gut microbiota

| **outcome** | **exposure** | **method** | **nsnp** | **b** | **se** | **P value** | **lo_ci** | **up_ci** | **or** | **or_lci95** | **or_uci95** | **egger_intercept** | **egger se** | **egger p value** |
| --- | --- | --- | --- | --- | --- | --- | --- | --- | --- | --- | --- | --- | --- | --- |
| Dermatographic urticaria | Acetate | MR Egger | 69 | -0.36397 | 0.690257 | 0.599732 | -1.71687 | 0.988937 | 0.694914 | 0.179627 | 2.688374 | -0.00788 | 0.022315 | 0.724971 |
| Weighted median | 69 | -0.46085 | 0.411953 | 0.263273 | -1.26827 | 0.346581 | 0.63075 | 0.281317 | 1.414223 |
| Inverse variance weighted | 69 | -0.58667 | 0.279488 | 0.03581 | -1.13446 | -0.03887 | 0.556178 | 0.321595 | 0.961876 |
| Simple mode | 69 | -0.75452 | 0.803363 | 0.350951 | -2.32911 | 0.82007 | 0.470236 | 0.097382 | 2.27066 |
| Weighted mode | 69 | -0.19551 | 0.642903 | 0.761972 | -1.4556 | 1.064575 | 0.822412 | 0.23326 | 2.899607 |
| Propionate | MR Egger | 17 | 0.371589 | 0.763252 | 0.633402 | -1.12438 | 1.867563 | 1.450037 | 0.324852 | 6.472506 | -0.03457 | 0.07895 | 0.667719 |
| Weighted median | 17 | 0.127382 | 0.230434 | 0.580405 | -0.32427 | 0.579032 | 1.135851 | 0.723057 | 1.78431 |
| Inverse variance weighted | 17 | 0.048527 | 0.19046 | 0.798885 | -0.32477 | 0.421829 | 1.049724 | 0.722691 | 1.524747 |
| Simple mode | 17 | 0.005112 | 0.362295 | 0.988918 | -0.70499 | 0.715211 | 1.005125 | 0.494115 | 2.044617 |
| Weighted mode | 17 | 0.069547 | 0.342726 | 0.841753 | -0.60219 | 0.741289 | 1.072023 | 0.547608 | 2.098639 |
| Butyrate | MR Egger | 255 | 0.078323 | 0.08577 | 0.36202 | -0.08979 | 0.246432 | 1.081472 | 0.914127 | 1.279452 | -0.00652 | 0.01752 | 0.710276 |
| Weighted median | 255 | 0.05392 | 0.069945 | 0.440772 | -0.08317 | 0.191012 | 1.0554 | 0.920193 | 1.210474 |
| Inverse variance weighted | 255 | 0.050955 | 0.044059 | 0.247473 | -0.0354 | 0.137312 | 1.052276 | 0.965218 | 1.147186 |
| Simple mode | 255 | -0.03839 | 0.151605 | 0.800315 | -0.33553 | 0.258758 | 0.962341 | 0.714957 | 1.295321 |
| Weighted mode | 255 | 0.029011 | 0.107774 | 0.788004 | -0.18223 | 0.240248 | 1.029436 | 0.833413 | 1.271565 |
| Isovalerate | MR Egger | 73 | -0.09787 | 0.086439 | 0.261323 | -0.26729 | 0.071546 | 0.906764 | 0.765448 | 1.074168 | 0.017604 | 0.026485 | 0.508411 |
| Weighted median | 73 | -0.09817 | 0.061318 | 0.109362 | -0.21836 | 0.022009 | 0.906491 | 0.803837 | 1.022253 |
| Inverse variance weighted | 73 | -0.04735 | 0.041167 | 0.250023 | -0.12804 | 0.033333 | 0.95375 | 0.879817 | 1.033895 |
| Simple mode | 73 | -0.26624 | 0.141942 | 0.064752 | -0.54444 | 0.011967 | 0.766256 | 0.580164 | 1.012039 |
| Weighted mode | 73 | -0.22174 | 0.107194 | 0.042179 | -0.43184 | -0.01164 | 0.801126 | 0.649315 | 0.98843 |
| Urticaria due to cold and heat | Acetate | MR Egger | 69 | -1.9452 | 1.838527 | 0.293845 | -5.54872 | 1.658312 | 0.142958 | 0.003892 | 5.250442 | 0.067463 | 0.059465 | 0.26063 |
| Weighted median | 69 | 0.716618 | 1.072395 | 0.50398 | -1.38528 | 2.818512 | 2.047496 | 0.250255 | 16.7519 |
| Inverse variance weighted | 69 | -0.04108 | 0.750454 | 0.956351 | -1.51197 | 1.429815 | 0.959757 | 0.220476 | 4.177925 |
| Simple mode | 69 | 0.984315 | 1.97647 | 0.620079 | -2.88957 | 4.858195 | 2.675977 | 0.0556 | 128.7916 |
| Weighted mode | 69 | 0.746386 | 1.564139 | 0.63476 | -2.31933 | 3.812099 | 2.109363 | 0.09834 | 45.2453 |
| Propionate | MR Egger | 17 | -2.20054 | 1.655935 | 0.203749 | -5.44617 | 1.045095 | 0.110744 | 0.004313 | 2.84367 | 0.233385 | 0.171327 | 0.193235 |
| Weighted median | 17 | -0.49846 | 0.586859 | 0.395676 | -1.6487 | 0.651783 | 0.607466 | 0.192299 | 1.918959 |
| Inverse variance weighted | 17 | -0.02008 | 0.424261 | 0.962243 | -0.85164 | 0.811467 | 0.980116 | 0.426717 | 2.251208 |
| Simple mode | 17 | -0.65345 | 1.058689 | 0.545772 | -2.72848 | 1.421583 | 0.520249 | 0.065319 | 4.143676 |
| Weighted mode | 17 | -0.93361 | 0.926171 | 0.328442 | -2.7489 | 0.881686 | 0.393132 | 0.063998 | 2.414967 |
| Butyrate | MR Egger | 255 | 0.077047 | 0.237888 | 0.746299 | -0.38921 | 0.543308 | 1.080092 | 0.677589 | 1.721692 | -0.02693 | 0.048593 | 0.579884 |
| Weighted median | 255 | 0.152636 | 0.186884 | 0.414076 | -0.21366 | 0.518929 | 1.164901 | 0.807626 | 1.680227 |
| Inverse variance weighted | 255 | -0.03607 | 0.122249 | 0.767982 | -0.27567 | 0.203542 | 0.964577 | 0.759061 | 1.225737 |
| Simple mode | 255 | 0.312845 | 0.439961 | 0.477691 | -0.54948 | 1.175169 | 1.367309 | 0.57725 | 3.238689 |
| Weighted mode | 255 | 0.188675 | 0.322336 | 0.558841 | -0.4431 | 0.820453 | 1.207649 | 0.642041 | 2.271528 |
| Isovalerate | MR Egger | 73 | 0.124821 | 0.240227 | 0.604962 | -0.34602 | 0.595665 | 1.132945 | 0.707496 | 1.814237 | -0.01621 | 0.073568 | 0.82623 |
| Weighted median | 73 | 0.215473 | 0.178781 | 0.228112 | -0.13494 | 0.565883 | 1.240448 | 0.873771 | 1.761001 |
| Inverse variance weighted | 73 | 0.078275 | 0.114411 | 0.493874 | -0.14597 | 0.30252 | 1.08142 | 0.864184 | 1.353265 |
| Simple mode | 73 | 0.305134 | 0.356437 | 0.394802 | -0.39348 | 1.003751 | 1.356807 | 0.674702 | 2.728498 |
| Weighted mode | 73 | 0.387732 | 0.282172 | 0.173674 | -0.16533 | 0.94079 | 1.473635 | 0.847618 | 2.562004 |
| Spontaneous urticaria | Acetate | MR Egger | 69 | -0.61634 | 0.339356 | 0.073812 | -1.28148 | 0.048795 | 0.539915 | 0.277626 | 1.050005 | 0.006113 | 0.010964 | 0.578971 |
| Weighted median | 69 | -0.42324 | 0.208241 | 0.042107 | -0.83139 | -0.01509 | 0.654921 | 0.435443 | 0.985024 |
| Inverse variance weighted | 69 | -0.44341 | 0.137767 | 0.001288 | -0.71343 | -0.17339 | 0.641844 | 0.489959 | 0.840812 |
| Simple mode | 69 | 0.02494 | 0.427973 | 0.9537 | -0.81389 | 0.863767 | 1.025254 | 0.443132 | 2.37208 |
| Weighted mode | 69 | -0.01118 | 0.402833 | 0.977948 | -0.80073 | 0.778377 | 0.988886 | 0.449002 | 2.177934 |
| Propionate | MR Egger | 17 | 0.144393 | 0.30505 | 0.642784 | -0.4535 | 0.74229 | 1.155338 | 0.635397 | 2.100742 | -0.00489 | 0.031543 | 0.878951 |
| Weighted median | 17 | 0.074085 | 0.104831 | 0.479746 | -0.13138 | 0.279555 | 1.076899 | 0.876881 | 1.322541 |
| Inverse variance weighted | 17 | 0.098705 | 0.077986 | 0.205629 | -0.05415 | 0.251558 | 1.103741 | 0.947292 | 1.286028 |
| Simple mode | 17 | 0.061922 | 0.196741 | 0.757026 | -0.32369 | 0.447534 | 1.06388 | 0.723475 | 1.56445 |
| Weighted mode | 17 | 0.073878 | 0.181112 | 0.688745 | -0.2811 | 0.428857 | 1.076675 | 0.754952 | 1.535501 |
| Butyrate | MR Egger | 263 | 0.031108 | 0.044821 | 0.488268 | -0.05674 | 0.118958 | 1.031597 | 0.944838 | 1.126323 | -0.00483 | 0.009164 | 0.598571 |
| Weighted median | 263 | 0.004855 | 0.034677 | 0.888659 | -0.06311 | 0.072821 | 1.004867 | 0.938839 | 1.075538 |
| Inverse variance weighted | 263 | 0.010815 | 0.022919 | 0.637011 | -0.03411 | 0.055737 | 1.010874 | 0.966469 | 1.057319 |
| Simple mode | 263 | -0.01914 | 0.08851 | 0.828998 | -0.19261 | 0.154343 | 0.981046 | 0.8248 | 1.166891 |
| Weighted mode | 263 | -0.02962 | 0.061311 | 0.629408 | -0.14979 | 0.090549 | 0.970813 | 0.860888 | 1.094775 |
| Isovalerate | MR Egger | 73 | -0.06694 | 0.044011 | 0.132682 | -0.15321 | 0.019318 | 0.935247 | 0.857952 | 1.019505 | 0.026938 | 0.013497 | 0.049787 |
| Weighted median | 73 | -0.01099 | 0.031236 | 0.725003 | -0.07221 | 0.050235 | 0.989072 | 0.930335 | 1.051518 |
| Inverse variance weighted | 73 | 0.010298 | 0.021108 | 0.625649 | -0.03107 | 0.05167 | 1.010351 | 0.969404 | 1.053028 |
| Simple mode | 73 | 0.033434 | 0.075049 | 0.657297 | -0.11366 | 0.180529 | 1.033999 | 0.89256 | 1.197851 |
| Weighted mode | 73 | -0.02913 | 0.057221 | 0.612298 | -0.14128 | 0.083026 | 0.971294 | 0.868247 | 1.08657 |

Abbreviations: snp, single-nucleotide polymorphisms; MR, Mendelian Randomization; b, beta; se, standard error; lo ci, lower confidence interval; up ci upper confidence interval; or, odds ratio; or lci95, lower confidence interval of odds ratio; or uci95, upper confidence interval of odds ratio

Table S6 MR results of causal effect between gut microbiota and SCFAs

| **urticaria** | **outcome** | **exposure** | **method** | **nsnp** | **b** | **se** | **P value** | **lo_ci** | **up_ci** | **or** | **or_lci95** | **or_uci95** | **egger_**  **intercept** | **egger se** | **egger p value** |
| --- | --- | --- | --- | --- | --- | --- | --- | --- | --- | --- | --- | --- | --- | --- | --- |
| Dermatographic urticaria | Acetate | family.Alcaligenaceae. | MR Egger | 15 | -0.03404 | 0.090404 | 0.712568 | -0.21124 | 0.143149 | 0.96653 | 0.809583 | 1.153901 | 0.001936 | 0.005801 | 0.743944 |
| Weighted median | 15 | 0.011286 | 0.029199 | 0.699123 | -0.04594 | 0.068516 | 1.01135 | 0.955095 | 1.070917 |
| Inverse variance weighted | 15 | -0.00472 | 0.021157 | 0.823634 | -0.04618 | 0.036752 | 0.995296 | 0.954868 | 1.037435 |
| Simple mode | 15 | 0.032054 | 0.048905 | 0.522817 | -0.0638 | 0.127908 | 1.032573 | 0.938192 | 1.136449 |
| Weighted mode | 15 | 0.027643 | 0.051917 | 0.602765 | -0.07411 | 0.1294 | 1.028029 | 0.928566 | 1.138146 |
| Spontaneous urticaria | phylum.Actinobacteria. | MR Egger | 17 | -0.05913 | 0.10139 | 0.568434 | -0.25785 | 0.139595 | 0.942585 | 0.772709 | 1.149808 | 0.006656 | 0.006039 | 0.287798 |
| Weighted median | 17 | 0.011519 | 0.028387 | 0.684903 | -0.04412 | 0.067158 | 1.011586 | 0.956839 | 1.069464 |
| Inverse variance weighted | 17 | 0.049241 | 0.024874 | 0.04774 | 0.000489 | 0.097994 | 1.050474 | 1.000489 | 1.102956 |
| Simple mode | 17 | -0.01596 | 0.054961 | 0.775299 | -0.12368 | 0.091767 | 0.98417 | 0.883663 | 1.096109 |
| Weighted mode | 17 | -0.01464 | 0.047321 | 0.761089 | -0.10739 | 0.078113 | 0.985471 | 0.89818 | 1.081245 |
| class.Betaproteobacteria. | MR Egger | 12 | -0.12386 | 0.08802 | 0.189696 | -0.29638 | 0.048662 | 0.883506 | 0.743508 | 1.049865 | 0.006683 | 0.005766 | 0.273372 |
| Weighted median | 12 | -0.02239 | 0.033976 | 0.509801 | -0.08899 | 0.044197 | 0.977854 | 0.914857 | 1.045189 |
| Inverse variance weighted | 12 | -0.02608 | 0.025489 | 0.306305 | -0.07603 | 0.023883 | 0.974262 | 0.926786 | 1.02417 |
| Simple mode | 12 | 0.054662 | 0.069765 | 0.449865 | -0.08208 | 0.191402 | 1.056184 | 0.921201 | 1.210946 |
| Weighted mode | 12 | 0.054662 | 0.066177 | 0.426354 | -0.07504 | 0.184369 | 1.056184 | 0.927703 | 1.202459 |
| order.Bifidobacteriales. | MR Egger | 18 | 0.007446 | 0.12317 | 0.952541 | -0.23397 | 0.248859 | 1.007474 | 0.791388 | 1.282562 | 0.003831 | 0.007888 | 0.633769 |
| Weighted median | 18 | 0.063872 | 0.030093 | 0.033794 | 0.004891 | 0.122854 | 1.065956 | 1.004903 | 1.130719 |
| Inverse variance weighted | 18 | 0.066025 | 0.024417 | 0.00685 | 0.018167 | 0.113884 | 1.068254 | 1.018333 | 1.120622 |
| Simple mode | 18 | 0.072989 | 0.061099 | 0.248647 | -0.04677 | 0.192743 | 1.075718 | 0.954311 | 1.212571 |
| Weighted mode | 18 | 0.070522 | 0.061121 | 0.264544 | -0.04928 | 0.190318 | 1.073068 | 0.951919 | 1.209635 |
| family.Bifidobacteriaceae. | MR Egger | 18 | 0.007446 | 0.12317 | 0.952541 | -0.23397 | 0.248859 | 1.007474 | 0.791388 | 1.282562 | 0.003831 | 0.007888 | 0.633769 |
| Weighted median | 18 | 0.063872 | 0.02988 | 0.032546 | 0.005308 | 0.122437 | 1.065956 | 1.005322 | 1.130248 |
| Inverse variance weighted | 18 | 0.066025 | 0.024417 | 0.00685 | 0.018167 | 0.113884 | 1.068254 | 1.018333 | 1.120622 |
| Simple mode | 18 | 0.072989 | 0.063843 | 0.268779 | -0.05214 | 0.198121 | 1.075718 | 0.949192 | 1.21911 |
| Weighted mode | 18 | 0.070522 | 0.063145 | 0.279607 | -0.05324 | 0.194285 | 1.073068 | 0.94815 | 1.214443 |
| family.Defluviitaleaceae. | MR Egger | 12 | 0.079414 | 0.05784 | 0.199758 | -0.03395 | 0.19278 | 1.082652 | 0.966617 | 1.212616 | -0.009 | 0.005967 | 0.162245 |
| Weighted median | 12 | -0.01904 | 0.023494 | 0.41769 | -0.06509 | 0.027008 | 0.98114 | 0.936984 | 1.027376 |
| Inverse variance weighted | 12 | -0.00377 | 0.018483 | 0.838195 | -0.04 | 0.032453 | 0.996233 | 0.960788 | 1.032985 |
| Simple mode | 12 | -0.0365 | 0.039161 | 0.371281 | -0.11326 | 0.040253 | 0.964156 | 0.89292 | 1.041074 |
| Weighted mode | 12 | -0.03265 | 0.044571 | 0.479152 | -0.12001 | 0.054709 | 0.967877 | 0.886912 | 1.056233 |
| genus.Alloprevotella. | MR Egger | 6 | -0.08678 | 0.135292 | 0.556163 | -0.35195 | 0.178394 | 0.916881 | 0.703316 | 1.195297 | 0.012777 | 0.018811 | 0.534267 |
| Weighted median | 6 | -0.00106 | 0.017347 | 0.95142 | -0.03506 | 0.032943 | 0.998944 | 0.96555 | 1.033492 |
| Inverse variance weighted | 6 | 0.004584 | 0.014527 | 0.752331 | -0.02389 | 0.033058 | 1.004595 | 0.976394 | 1.033611 |
| Simple mode | 6 | -0.00353 | 0.025334 | 0.894644 | -0.05318 | 0.046125 | 0.996477 | 0.948206 | 1.047205 |
| Weighted mode | 6 | -0.00353 | 0.024244 | 0.889947 | -0.05105 | 0.043989 | 0.996477 | 0.950234 | 1.044971 |
| genus.Anaerostipes. | MR Egger | 13 | -0.03281 | 0.079178 | 0.686567 | -0.188 | 0.122379 | 0.967723 | 0.828617 | 1.130183 | 0.001883 | 0.005171 | 0.72268 |
| Weighted median | 13 | -0.01516 | 0.030859 | 0.623219 | -0.07564 | 0.045323 | 0.984953 | 0.927145 | 1.046366 |
| Inverse variance weighted | 13 | -0.00528 | 0.02265 | 0.815649 | -0.04967 | 0.039113 | 0.994733 | 0.951539 | 1.039888 |
| Simple mode | 13 | -0.02539 | 0.048774 | 0.612074 | -0.12099 | 0.070202 | 0.974925 | 0.886042 | 1.072725 |
| Weighted mode | 13 | -0.02738 | 0.050484 | 0.597565 | -0.12632 | 0.071573 | 0.972996 | 0.881329 | 1.074197 |
| genus.DefluviitaleaceaeUCG011. | MR Egger | 10 | 0.081606 | 0.05942 | 0.20689 | -0.03486 | 0.198068 | 1.085028 | 0.965744 | 1.219046 | -0.01008 | 0.006118 | 0.138065 |
| Weighted median | 10 | -0.01835 | 0.024266 | 0.449659 | -0.06591 | 0.029217 | 0.981822 | 0.936218 | 1.029648 |
| Inverse variance weighted | 10 | -0.01211 | 0.017408 | 0.486707 | -0.04623 | 0.022011 | 0.987965 | 0.954825 | 1.022255 |
| Simple mode | 10 | -0.03817 | 0.042867 | 0.396457 | -0.12218 | 0.045853 | 0.962553 | 0.884985 | 1.04692 |
| Weighted mode | 10 | -0.03436 | 0.044777 | 0.462519 | -0.12212 | 0.053402 | 0.966224 | 0.88504 | 1.054854 |
| genus.Intestinibacter. | MR Egger | 14 | 0.038982 | 0.058601 | 0.518491 | -0.07587 | 0.15384 | 1.039752 | 0.926932 | 1.166304 | -0.00178 | 0.004666 | 0.70961 |
| Weighted median | 14 | 0.022017 | 0.026261 | 0.401813 | -0.02946 | 0.07349 | 1.022262 | 0.970974 | 1.076258 |
| Inverse variance weighted | 14 | 0.017787 | 0.018574 | 0.338235 | -0.01862 | 0.054192 | 1.017946 | 0.981555 | 1.055687 |
| Simple mode | 14 | -0.03334 | 0.04631 | 0.484254 | -0.12411 | 0.057423 | 0.967205 | 0.883281 | 1.059104 |
| Weighted mode | 14 | 0.043666 | 0.045191 | 0.351552 | -0.04491 | 0.13224 | 1.044633 | 0.956085 | 1.141382 |
| genus.LachnospiraceaeUCG010. | MR Egger | 10 | ###### | 0.055556 | 0.904148 | -0.11579 | 0.101984 | 0.993119 | 0.890658 | 1.107366 | 0.000614 | 0.004546 | 0.895877 |
| Weighted median | 10 | 6.49E-03 | 0.028357 | 0.819085 | -0.04909 | 0.062066 | 1.006507 | 0.952092 | 1.064032 |
| Inverse variance weighted | 10 | 4.19E-05 | 0.021019 | 0.99841 | -0.04116 | 0.041239 | 1.000042 | 0.95968 | 1.042101 |
| Simple mode | 10 | 5.28E-03 | 0.043067 | 0.905194 | -0.07914 | 0.089687 | 1.00529 | 0.923915 | 1.093831 |
| Weighted mode | 10 | 1.16E-02 | 0.039593 | 0.776268 | -0.06601 | 0.089197 | 1.011663 | 0.936125 | 1.093296 |
| **urticaria** | **outcome** | **exposure** | **method** | **nsnp** | **b** | **se** | **P value** | **lo_ci** | **up_ci** | **or** | **or_lci95** | **or_uci95** | **egger_intercept** | **egger se** | **egger p value** |
| Dermatographic urticaria | family.Alcaligenaceae. | Acetate | MR Egger | 35 | -0.02114 | 0.270351 | 0.938157 | -0.55102 | 0.508752 | 0.979086 | 0.576359 | 1.663214 | -0.00722 | 0.007888 | 0.366594 |
| Weighted median | 35 | -0.09889 | 0.110619 | 0.371363 | -0.3157 | 0.117929 | 0.905847 | 0.729279 | 1.125164 |
| Inverse variance weighted | 35 | -0.25627 | 0.084176 | 0.002331 | -0.42125 | -0.09128 | 0.773935 | 0.656224 | 0.912761 |
| Simple mode | 35 | -0.07914 | 0.218686 | 0.719681 | -0.50776 | 0.349487 | 0.923912 | 0.60184 | 1.418339 |
| Weighted mode | 35 | -0.04474 | 0.158084 | 0.778889 | -0.35458 | 0.265107 | 0.956247 | 0.701465 | 1.30357 |
| Spontaneous urticaria | phylum.Actinobacteria. | MR Egger | 33 | 0.072262 | 0.258537 | 0.781714 | -0.43447 | 0.578996 | 1.074937 | 0.647607 | 1.784245 | 0.000493 | 0.00759 | 0.948624 |
| Weighted median | 33 | 0.051253 | 0.106713 | 0.631024 | -0.15791 | 0.260411 | 1.052589 | 0.853931 | 1.297463 |
| Inverse variance weighted | 33 | 0.088175 | 0.081359 | 0.278459 | -0.07129 | 0.247638 | 1.09218 | 0.931194 | 1.280996 |
| Simple mode | 33 | -0.00639 | 0.185538 | 0.972721 | -0.37005 | 0.35726 | 0.993626 | 0.690701 | 1.429407 |
| Weighted mode | 33 | 0.016497 | 0.13423 | 0.902955 | -0.24659 | 0.279588 | 1.016634 | 0.781458 | 1.322585 |
| class.Betaproteobacteria. | MR Egger | 35 | 0.000865 | 0.267266 | 0.997438 | -0.52298 | 0.524705 | 1.000865 | 0.592754 | 1.689961 | -0.00746 | 0.007798 | 0.345628 |
| Weighted median | 35 | -0.07982 | 0.11943 | 0.503909 | -0.3139 | 0.154261 | 0.923282 | 0.73059 | 1.166796 |
| Inverse variance weighted | 35 | -0.24208 | 0.083299 | 0.003658 | -0.40535 | -0.07882 | 0.78499 | 0.666744 | 0.924208 |
| Simple mode | 35 | -0.00359 | 0.21269 | 0.986623 | -0.42046 | 0.41328 | 0.996414 | 0.656742 | 1.511768 |
| Weighted mode | 35 | -0.02975 | 0.14559 | 0.839309 | -0.31511 | 0.255607 | 0.970689 | 0.729712 | 1.291245 |
| order.Bifidobacteriales. | MR Egger | 33 | 0.11722 | 0.260482 | 0.655832 | -0.39332 | 0.627765 | 1.124367 | 0.67481 | 1.873419 | -0.00065 | 0.007646 | 0.932792 |
| Weighted median | 33 | 0.071217 | 0.119036 | 0.549653 | -0.16209 | 0.304526 | 1.073814 | 0.850362 | 1.355983 |
| Inverse variance weighted | 33 | 0.096234 | 0.083196 | 0.247388 | -0.06683 | 0.259298 | 1.101017 | 0.935354 | 1.29602 |
| Simple mode | 33 | 0.03221 | 0.216522 | 0.882677 | -0.39217 | 0.456593 | 1.032734 | 0.675587 | 1.578687 |
| Weighted mode | 33 | 0.054113 | 0.155815 | 0.730647 | -0.25128 | 0.359511 | 1.055604 | 0.777801 | 1.432628 |
| family.Bifidobacteriaceae. | MR Egger | 33 | 0.11722 | 0.260482 | 0.655832 | -0.39332 | 0.627765 | 1.124367 | 0.67481 | 1.873419 | -0.00065 | 0.007646 | 0.932792 |
| Weighted median | 33 | 0.071217 | 0.117219 | 0.543484 | -0.15853 | 0.300966 | 1.073814 | 0.853395 | 1.351163 |
| Inverse variance weighted | 33 | 0.096234 | 0.083196 | 0.247388 | -0.06683 | 0.259298 | 1.101017 | 0.935354 | 1.29602 |
| Simple mode | 33 | 0.03221 | 0.202469 | 0.874602 | -0.36463 | 0.429049 | 1.032734 | 0.694454 | 1.535797 |
| Weighted mode | 33 | 0.054113 | 0.170778 | 0.753406 | -0.28061 | 0.388838 | 1.055604 | 0.755322 | 1.475265 |
| family.Defluviitaleaceae. | MR Egger | 35 | -1.19441 | 0.347691 | 0.001616 | -1.87588 | -0.51293 | 0.302883 | 0.15322 | 0.598736 | 0.033345 | 0.010153 | 0.002427 |
| Weighted median | 35 | -0.24756 | 0.159904 | 0.121576 | -0.56098 | 0.065849 | 0.780701 | 0.570652 | 1.068066 |
| Inverse variance weighted | 35 | -0.10972 | 0.111153 | 0.323602 | -0.32758 | 0.108142 | 0.896088 | 0.720669 | 1.114206 |
| Simple mode | 35 | 0.075609 | 0.386211 | 0.845954 | -0.68136 | 0.832583 | 1.078541 | 0.505926 | 2.29925 |
| Weighted mode | 35 | -0.47325 | 0.239527 | 0.056341 | -0.94272 | -0.00378 | 0.622974 | 0.389565 | 0.996229 |
| genus.Alloprevotella. | MR Egger | 18 | 0.726838 | 1.75702 | 0.684603 | -2.71692 | 4.170596 | 2.068528 | 0.066078 | 64.75402 | -0.03034 | 0.043525 | 0.495764 |
| Weighted median | 18 | -0.65774 | 0.377542 | 0.081481 | -1.39772 | 0.082245 | 0.518022 | 0.24716 | 1.085721 |
| Inverse variance weighted | 18 | -0.48246 | 0.27836 | 0.083057 | -1.02804 | 0.063128 | 0.617265 | 0.357706 | 1.065163 |
| Simple mode | 18 | -0.98714 | 0.700619 | 0.176876 | -2.36036 | 0.38607 | 0.37264 | 0.094386 | 1.471187 |
| Weighted mode | 18 | -0.99964 | 0.722661 | 0.184477 | -2.41606 | 0.416771 | 0.36801 | 0.089273 | 1.517055 |
| genus.Anaerostipes. | MR Egger | 35 | 0.13986 | 0.276868 | 0.616812 | -0.4028 | 0.682522 | 1.150112 | 0.668444 | 1.978861 | -0.00096 | 0.008079 | 0.906403 |
| Weighted median | 35 | 0.117188 | 0.114225 | 0.304922 | -0.10669 | 0.341069 | 1.12433 | 0.898801 | 1.40645 |
| Inverse variance weighted | 35 | 0.108694 | 0.08516 | 0.20183 | -0.05822 | 0.275608 | 1.114821 | 0.943443 | 1.317331 |
| Simple mode | 35 | 0.153482 | 0.216952 | 0.484112 | -0.27175 | 0.578709 | 1.165887 | 0.762049 | 1.783734 |
| Weighted mode | 35 | 0.130889 | 0.142773 | 0.365725 | -0.14895 | 0.410724 | 1.139841 | 0.861615 | 1.50791 |
| genus.DefluviitaleaceaeUCG011. | MR Egger | 35 | -1.21492 | 0.348135 | 0.001394 | -1.89727 | -0.53258 | 0.296733 | 0.149978 | 0.587089 | 0.033833 | 0.010166 | 0.002158 |
| Weighted median | 35 | -0.23148 | 0.165961 | 0.163085 | -0.55676 | 0.093806 | 0.79336 | 0.573061 | 1.098347 |
| Inverse variance weighted | 35 | -0.11433 | 0.112096 | 0.307743 | -0.33404 | 0.105373 | 0.89196 | 0.716024 | 1.111125 |
| Simple mode | 35 | 0.125871 | 0.412157 | 0.761926 | -0.68196 | 0.933699 | 1.134136 | 0.505627 | 2.543901 |
| Weighted mode | 35 | -0.50331 | 0.230986 | 0.036361 | -0.95604 | -0.05057 | 0.604528 | 0.384412 | 0.950683 |
| genus.Intestinibacter. | MR Egger | 35 | -0.39413 | 0.333318 | 0.245482 | -1.04743 | 0.259175 | 0.674268 | 0.350838 | 1.295861 | 0.01319 | 0.009729 | 0.184384 |
| Weighted median | 35 | 0.046494 | 0.136862 | 0.73407 | -0.22175 | 0.314743 | 1.047592 | 0.801112 | 1.369907 |
| Inverse variance weighted | 35 | 0.035134 | 0.105443 | 0.73898 | -0.17153 | 0.241802 | 1.035759 | 0.842372 | 1.273542 |
| Simple mode | 35 | 0.164197 | 0.294951 | 0.581383 | -0.41391 | 0.742301 | 1.178447 | 0.661063 | 2.100763 |
| Weighted mode | 35 | 0.081128 | 0.224572 | 0.720142 | -0.35903 | 0.521288 | 1.08451 | 0.698352 | 1.684196 |
| genus.LachnospiraceaeUCG010. | MR Egger | 35 | 0.649376 | 0.294827 | 0.034719 | 0.071516 | 1.227237 | 1.914347 | 1.074135 | 3.411791 | -0.02221 | 0.008606 | 0.014494 |
| Weighted median | 35 | 0.048409 | 0.12962 | 0.708801 | -0.20565 | 0.302464 | 1.0496 | 0.814121 | 1.353189 |
| Inverse variance weighted | 35 | -0.07345 | 0.099438 | 0.46015 | -0.26834 | 0.121454 | 0.929187 | 0.764645 | 1.129137 |
| Simple mode | 35 | -0.43432 | 0.305034 | 0.163605 | -1.03219 | 0.163546 | 0.647705 | 0.356227 | 1.17768 |
| Weighted mode | 35 | 0.216207 | 0.174035 | 0.222619 | -0.1249 | 0.557315 | 1.241359 | 0.882584 | 1.745978 |

Abbreviations: snp, single-nucleotide polymorphisms; MR, Mendelian Randomization; b, beta; se, standard error; lo ci, lower confidence interval; up ci upper confidence interval; or, odds ratio; or lci95, lower confidence interval of odds ratio; or uci95, upper confidence interval of odds ratio

Table S7 Horizontal pleiotropy and sensitivity analysis of Mendelian randomization between SCFAs and urticaria

| **outcome** | **exposure** | **method** | **Causal Estimate** | **Sd** | **T-stat** | **P-value** | **Residual sum of squares** | **Global Test Pvalue** | **method** | **Q** | **Q_df** | **Q_pval** |
| --- | --- | --- | --- | --- | --- | --- | --- | --- | --- | --- | --- | --- |
| Dermatographic urticaria | Acetate | Raw | -0.58667 | 0.279488 | -2.09907 | 0.039526 | 74.66438 | 0.336 | MR Egger | 72.39599 | 67 | 0.304521 |
| Outlier-corrected | NA | NA | NA | NA |  |  | IVW | 72.53087 | 68 | 0.331017 |
| Propionate | Raw | 0.048527 | 0.19046 | 0.254791 | 0.802131 | 27.70418 | 0.089 | MR Egger | 24.52327 | 15 | 0.056724 |
| Outlier-corrected | NA | NA | NA | NA |  |  | IVW | 24.83673 | 16 | 0.072756 |
| Butyrate | Raw | 0.050955 | 0.042096 | 1.21045 | 0.227231 | 233.6831 | 0.83 | MR Egger | 231.7285 | 253 | 0.827329 |
| Outlier-corrected | NA | NA | NA | NA |  |  | IVW | 231.8668 | 254 | 0.837015 |
| Isovalerate | Raw | -0.04735 | 0.037953 | -1.24769 | 0.216187 | 63.04817 | 0.812 | MR Egger | 60.75594 | 71 | 0.801835 |
| Outlier-corrected | NA | NA | NA | NA |  |  | IVW | 61.19773 | 72 | 0.81415 |
| Temperature-Triggered Urticaria (Urticaria due to cold and heat) | Acetate | Raw | -0.04108 | 0.717535 | -0.05724 | 0.954518 | 63.63446 | 0.688 | MR Egger | 60.87801 | 67 | 0.687155 |
| Outlier-corrected | NA | NA | NA | NA |  |  | IVW | 62.16508 | 68 | 0.676448 |
| Propionate | Raw | -0.02008 | 0.382861 | -0.05246 | 0.958813 | 14.8296 | 0.653 | MR Egger | 11.17412 | 15 | 0.740157 |
| Outlier-corrected | NA | NA | NA | NA |  |  | IVW | 13.02976 | 16 | 0.670581 |
| Butyrate | Raw | -0.03607 | 0.108494 | -0.33242 | 0.739847 | 201.3692 | 0.993 | MR Egger | 199.7494 | 253 | 0.99425 |
| Outlier-corrected | NA | NA | NA | NA |  |  | IVW | 200.0566 | 254 | 0.994726 |
| Isovalerate | Raw | 0.078275 | 0.111922 | 0.699374 | 0.486572 | 71.05282 | 0.585 | MR Egger | 68.85316 | 71 | 0.550088 |
| Outlier-corrected | NA | NA | NA | NA |  |  | IVW | 68.90172 | 72 | 0.581681 |
| Spontaneous urticaria | Acetate | Raw | -0.44341 | 0.117218 | -3.78279 | 0.00033 | 50.86153 | 0.948 | MR Egger | 48.91651 | 67 | 0.952644 |
| Outlier-corrected | NA | NA | NA | NA |  |  | IVW | 49.22743 | 68 | 0.958086 |
| Propionate | Raw | 0.098705 | 0.066981 | 1.473629 | 0.159983 | 13.43048 | 0.759 | MR Egger | 11.77893 | 15 | 0.69568 |
| Outlier-corrected | NA | NA | NA | NA |  |  | IVW | 11.80293 | 16 | 0.757431 |
| Butyrate | Raw | 0.010815 | 0.022919 | 0.471882 | 0.637404 | 282.5826 | 0.0193 | MR Egger | 280.2565 | 261 | 0.197118 |
| Outlier-corrected | NA | NA | NA | NA |  |  | IVW | 280.5548 | 262 | 0.205781 |
| Isovalerate | Raw | 0.010298 | 0.021108 | 0.48786 | 0.627132 | 75.19636 | 0.42 | MR Egger | 69.06157 | 71 | 0.543027 |
| Outlier-corrected | NA | NA | NA | NA |  |  | IVW | 73.04498 | 72 | 0.443465 |

Abbreviations: Sd, standard deviation; T-stat, T-statistic; Q, Cochran’s Q; df, degree of freedom; pval, p value; MR, Mendelian Randomization; IVW, Inverse variance weighted

Table S8 Horizontal pleiotropy and sensitivity analysis of bidirectional Mendelian randomization between gut microbiota and SCFAs

| **outcome** | **exposure** | **method** | **Causal Estimate** | **Sd** | **T-stat** | **P-value** | **Residual sum of squares** | **Global Test P value** | **method** | **Q** | **Q_df** | **Q_pval** |
| --- | --- | --- | --- | --- | --- | --- | --- | --- | --- | --- | --- | --- |
| Acetate | family.Alcaligenaceae. | Raw | -0.00472 | 0.020001 | -0.23576 | 0.817036 | 14.30912 | 0.581 | MR Egger | 12.40051 | 13 | 0.495107 |
| Outlier-corrected | NA | NA | NA | NA |  |  | IVW | 12.51185 | 14 | 0.565268 |
| phylum.Actinobacteria. | Raw | 0.049241 | 0.024874 | 1.979673 | 0.06521 | 26.80414 | 0.119 | MR Egger | 22.11609 | 15 | 0.104796 |
| Outlier-corrected | NA | NA | NA | NA |  |  | IVW | 23.90686 | 16 | 0.091559 |
| class.Betaproteobacteria. | Raw | -0.02608 | 0.025489 | -1.02301 | 0.328276 | 15.39422 | 0.305 | MR Egger | 11.36667 | 10 | 0.329673 |
| Outlier-corrected | NA | NA | NA | NA |  |  | IVW | 12.89361 | 11 | 0.300336 |
| order.Bifidobacteriales. | Raw | 0.066025 | 0.024417 | 2.704032 | 0.015048 | 32.91549 | 0.031 | MR Egger | 28.877 | 16 | 0.024779 |
| Outlier-corrected | NA | NA | NA | NA |  |  | IVW | 29.30275 | 17 | 0.031834 |
| family.Bifidobacteriaceae. | Raw | 0.066025 | 0.02441739 | 2.704032 | 0.01504783 | 32.91549 | 0.033 | MR Egger | 28.877 | 16 | 0.024779 |
| Outlier-corrected | NA | NA | NA | NA |  |  | IVW | 29.30275 | 17 | 0.031834 |
| family.Defluviitaleaceae. | Raw | -0.00377 | 0.018483 | -0.2042 | 0.841924 | 17.42508 | 0.0235 | MR Egger | 11.87932 | 10 | 0.293214 |
| Outlier-corrected | NA | NA | NA | NA |  |  | IVW | 14.58408 | 11 | 0.20234 |
| genus.Alloprevotella. | Raw | 0.004584 | 0.008149 | 0.56259 | 0.598002 | 2.221397 | 0.901 | MR Egger | 1.11181 | 4 | 0.892394 |
| Outlier-corrected | NA | NA | NA | NA |  |  | IVW | 1.573154 | 5 | 0.904477 |
| genus.Anaerostipes. | Raw | -0.00528 | 0.02265 | -0.23315 | 0.819578 | 14.70954 | 0.407 | MR Egger | 12.33516 | 11 | 0.338985 |
| Outlier-corrected | NA | NA | NA | NA |  |  | IVW | 12.48382 | 12 | 0.407646 |
| genus.DefluviitaleaceaeUCG011. | Raw | -0.01211 | 0.017408 | -0.69556 | 0.504269 | 11.76333 | 0.401 | MR Egger | 6.525094 | 8 | 0.588626 |
| Outlier-corrected | NA | NA | NA | NA |  |  | IVW | 9.239427 | 9 | 0.415473 |
| genus.Intestinibacter. | Raw | 0.017787 | 0.016365 | 1.086884 | 0.29683 | 11.66819 | 0.693 | MR Egger | 9.947066 | 12 | 0.620605 |
| Outlier-corrected | NA | NA | NA | NA |  |  | IVW | 10.09249 | 13 | 0.686354 |
| genus.LachnospiraceaeUCG010. | Raw | 4.19E-05 | 0.018092 | 0.002316 | 0.998203 | 8.225786 | 0.689 | MR Egger | 6.649325 | 8 | 0.574896 |
| Outlier-corrected | NA | NA | NA | NA |  |  | IVW | 6.667575 | 9 | 0.671685 |
| **outcome** | **exposure** | **method** | **Causal Estimate** | **Sd** | **T-stat** | **P-value** | **Residual sum of squares** | **Global Test P value** | **method** | **Q** | **Q_df** | **Q_pval** |
| family.Alcaligenaceae. | Acetate | Raw | -0.25627 | 0.084176 | -3.04441 | 0.004478 | 44.26425 | 0.182 | MR Egger | 40.47025 | 33 | 0.173915 |
| Outlier-corrected | NA | NA | NA | NA |  |  | IVW | 41.49802 | 34 | 0.176323 |
| phylum.Actinobacteria. | Raw | 0.088175 | 0.081359 | 1.083788 | 0.286558 | 38.52262 | 0.281 | MR Egger | 36.92681 | 31 | 0.213891 |
| Outlier-corrected | NA | NA | NA | NA |  |  | IVW | 36.93184 | 32 | 0.251485 |
| class.Betaproteobacteria. | Raw | -0.24208 | 0.083299 | -2.90621 | 0.006395 | 44.03325 | 0.178 | MR Egger | 40.34162 | 33 | 0.177488 |
| Outlier-corrected | NA | NA | NA | NA |  |  | IVW | 41.46074 | 34 | 0.17735 |
| order.Bifidobacteriales. | Raw | 0.096234 | 0.069101 | 1.392658 | 0.173325 | 23.16526 | 0.919 | MR Egger | 22.06848 | 31 | 0.88085 |
| Outlier-corrected | NA | NA | NA | NA |  |  | IVW | 22.07571 | 32 | 0.905363 |
| family.Bifidobacteriaceae. | Raw | 0.096234 | 0.069101 | 1.392658 | 0.173325 | 23.16526 | 0.927 | MR Egger | 22.06848 | 31 | 0.88085 |
| Outlier-corrected | NA | NA | NA | NA |  |  | IVW | 22.07571 | 32 | 0.905363 |
| family.Defluviitaleaceae. | Raw | -0.10972 | 0.111153 | -0.98708 | 0.330575 | 38.68679 | 0.367 | MR Egger | 24.81651 | 33 | 0.846417 |
| Outlier-corrected | NA | NA | NA | NA |  |  | IVW | 35.60172 | 34 | 0.392844 |
| genus.Alloprevotella. | Raw | -0.48246 | 0.23852 | -2.02272 | 0.059123 | 14.00737 | 0.779 | MR Egger | 11.99609 | 16 | 0.744249 |
| Outlier-corrected | NA | NA | NA | NA |  |  | IVW | 12.48199 | 17 | 0.770114 |
| genus.Anaerostipes. | Raw | 0.108694 | 0.08516 | 1.276356 | 0.21048 | 44.58217 | 0.174 | MR Egger | 42.69217 | 33 | 0.120352 |
| Outlier-corrected | NA | NA | NA | NA |  |  | IVW | 42.71033 | 34 | 0.145276 |
| genus.DefluviitaleaceaeUCG011. | Raw | -0.11433 | 0.112096 | -1.01997 | 0.314946 | 39.33324 | 0.337 | MR Egger | 25.04385 | 33 | 0.838285 |
| Outlier-corrected | NA | NA | NA | NA |  |  | IVW | 36.1191 | 34 | 0.369804 |
| genus.Intestinibacter. | Raw | 0.035134 | 0.105443 | 0.333205 | 0.741026 | 50.99498 | 0.057 | MR Egger | 45.13636 | 33 | 0.077501 |
| Outlier-corrected | NA | NA | NA | NA |  |  | IVW | 47.6504 | 34 | 0.060197 |
| genus.LachnospiraceaeUCG010. | Raw | -0.07345 | 0.099438 | -0.7386 | 0.465218 | 48.36467 | 0.088 | MR Egger | 37.93605 | 33 | 0.25434 |
| Outlier-corrected | NA | NA | NA | NA |  |  | IVW | 45.59251 | 34 | 0.088397 |

Abbreviations: Sd, standard deviation; T-stat, T-statistic; Q, Cochran’s Q; df, degree of freedom; pval, p value; MR, Mendelian Randomization; IVW, Inverse variance weighted

Table S9 Multivariable MR results of causal effect between gut microbiota and urticaria after adjustment

| outcome | Adjustment | exposure | methods | b | se | P | or | lci95 | uci95 | or_lci95 | or_uci95 |
| --- | --- | --- | --- | --- | --- | --- | --- | --- | --- | --- | --- |
| Spontaneous urticaria | Acetate | phylum.Actinobacteria. | MVMR-IVW | 0.261774 | 0.077547 | 0.000736 | 1.299233 | 0.109782 | 0.413767 | 1.116034 | 1.512505 |
| order.Bifidobacteriales. | MVMR-IVW | 0.225675 | 0.065997 | 0.000627 | 1.253169 | 0.096321 | 0.35503 | 1.101112 | 1.426223 |
| family.Bifidobacteriaceae. | MVMR-IVW | 0.225675 | 0.065997 | 0.000627 | 1.253169 | 0.096321 | 0.35503 | 1.101112 | 1.426223 |
| Dermatographic urticaria | family.Alcaligenaceae. | Acetate | MVMR-IVW | -0.85388 | 0.31709 | 0.007084 | 0.425758 | -1.47538 | -0.23239 | 0.228692 | 0.79264 |
| Spontaneous urticaria | class.Betaproteobacteria. | MVMR-IVW | -0.43533 | 0.135252 | 0.001288 | 0.647049 | -0.70043 | -0.17024 | 0.496373 | 0.843463 |

Abbreviations: snp, single-nucleotide polymorphisms; MR, Mendelian Randomization; b, beta; se, standard error; lo ci, lower confidence interval; up ci upper confidence interval; or, odds ratio; or lci95, lower confidence interval of odds ratio; or uci95, upper confidence interval of odds ratio; MVMR, Multivariable Mendelian Randomization; IVW, Inverse variance weighted

**Appendix 1**

**Dermatographic urticaria**

**
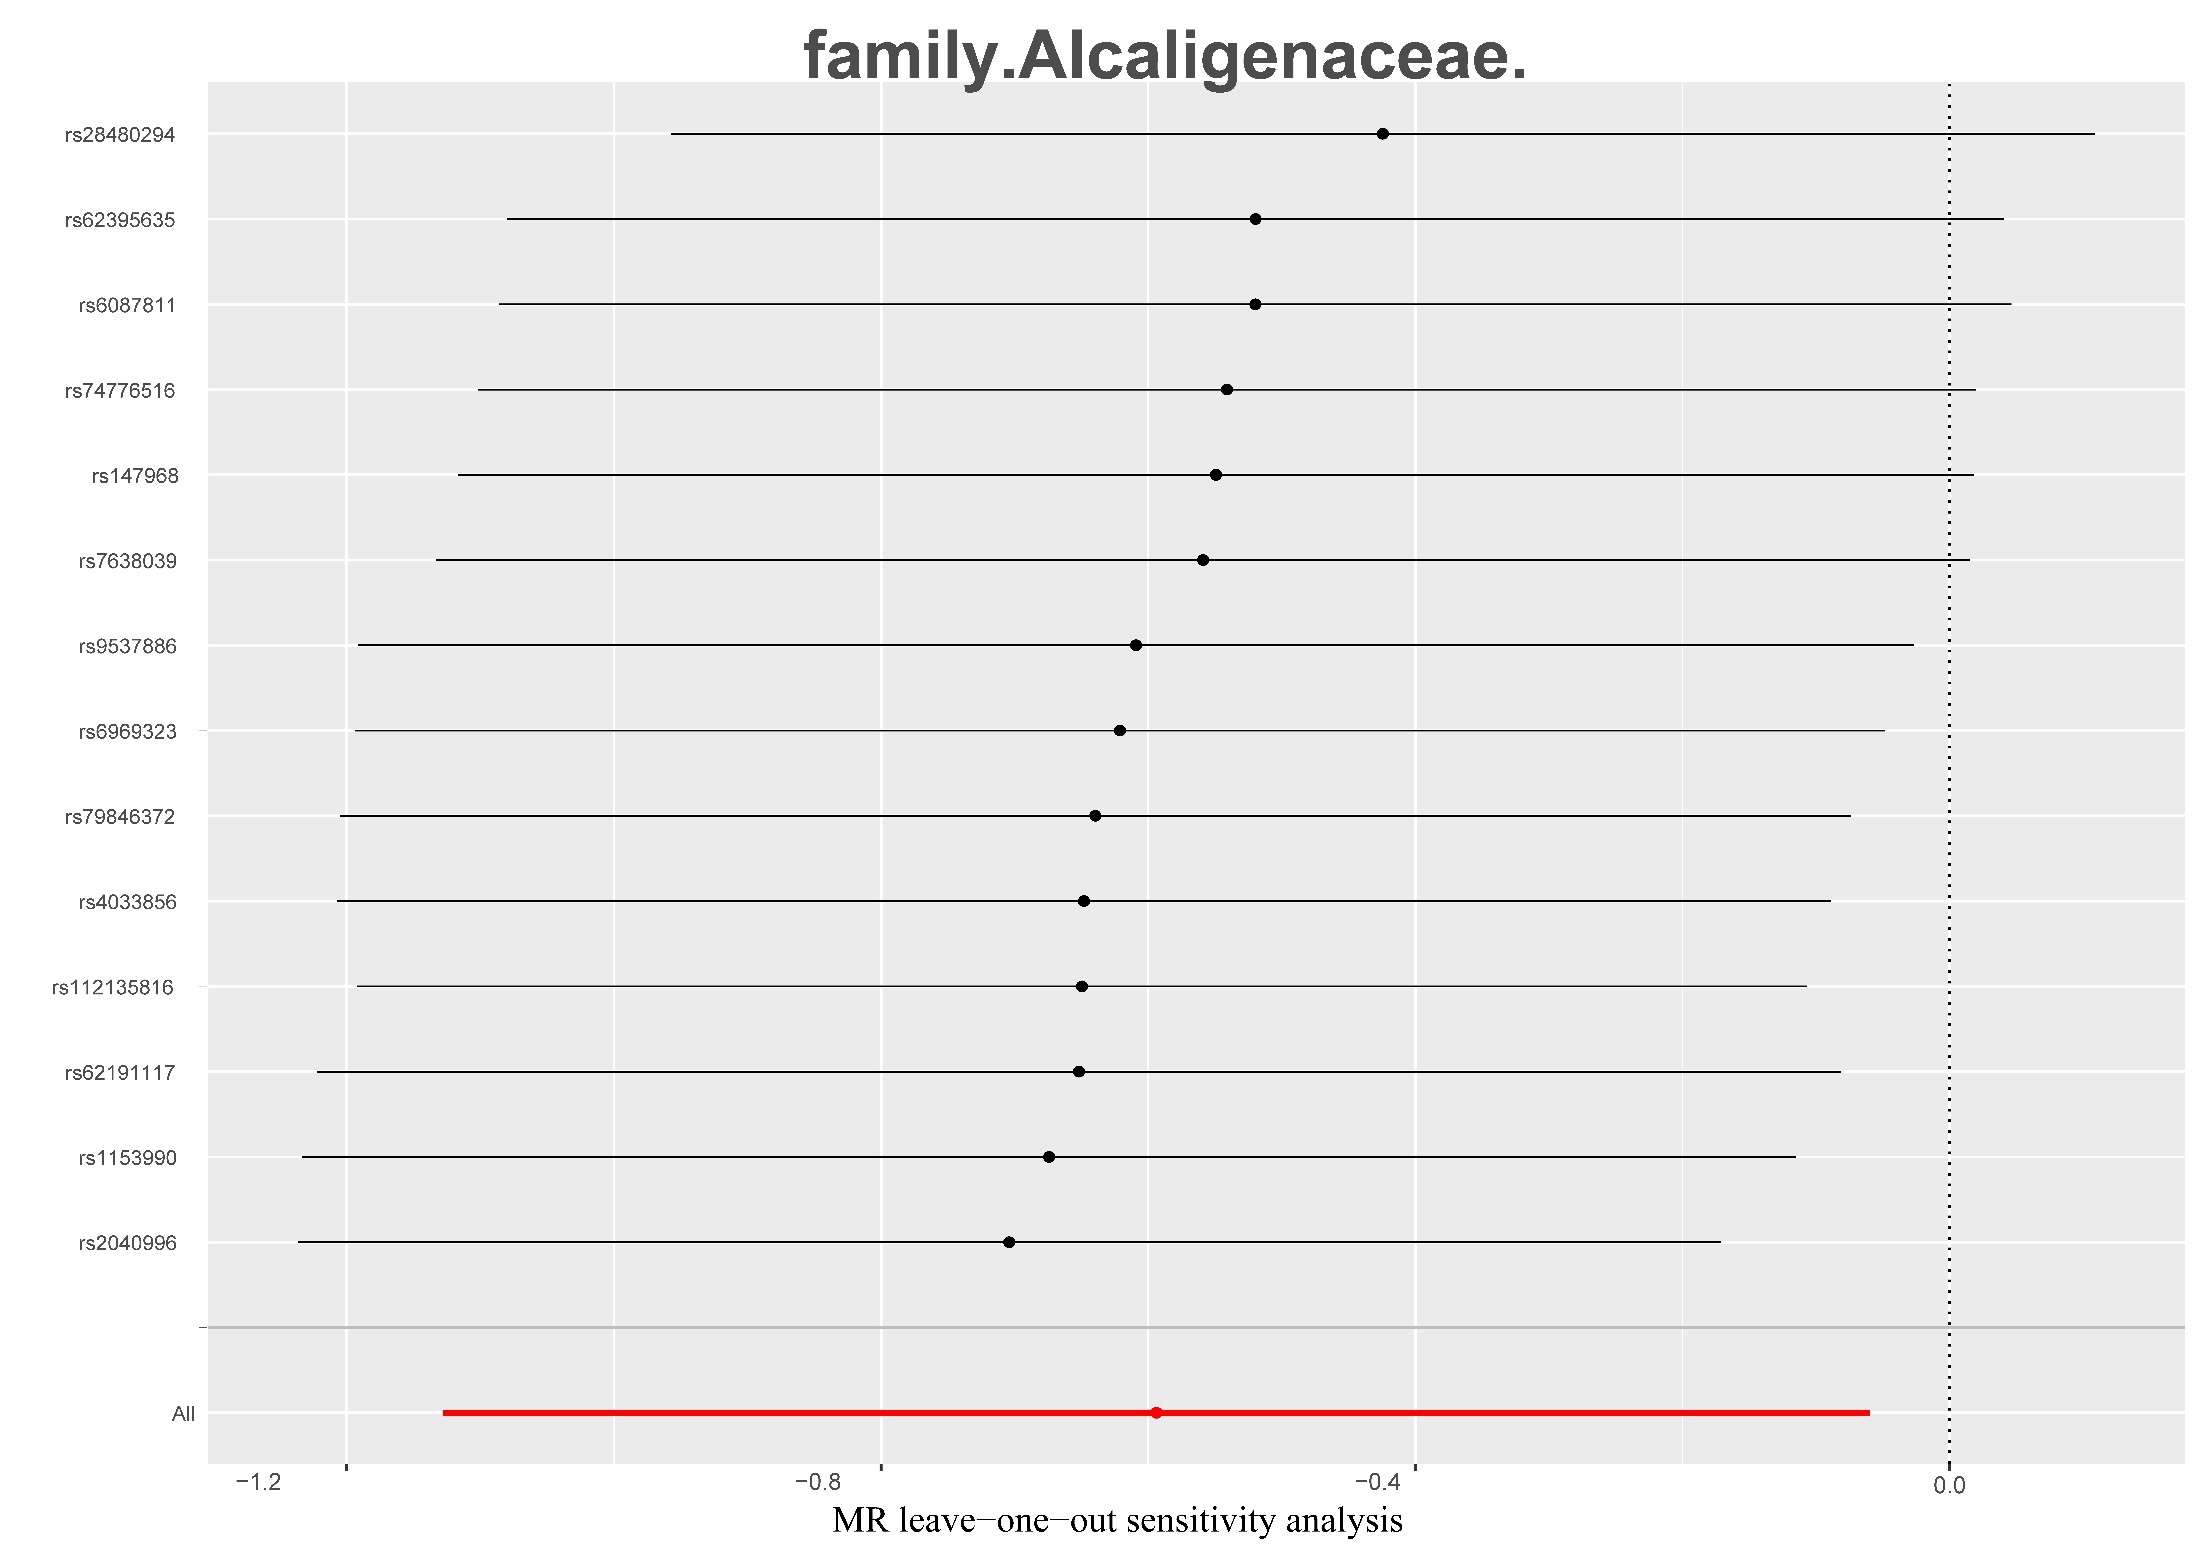
**

**Urticaria due to cold and heat**

**
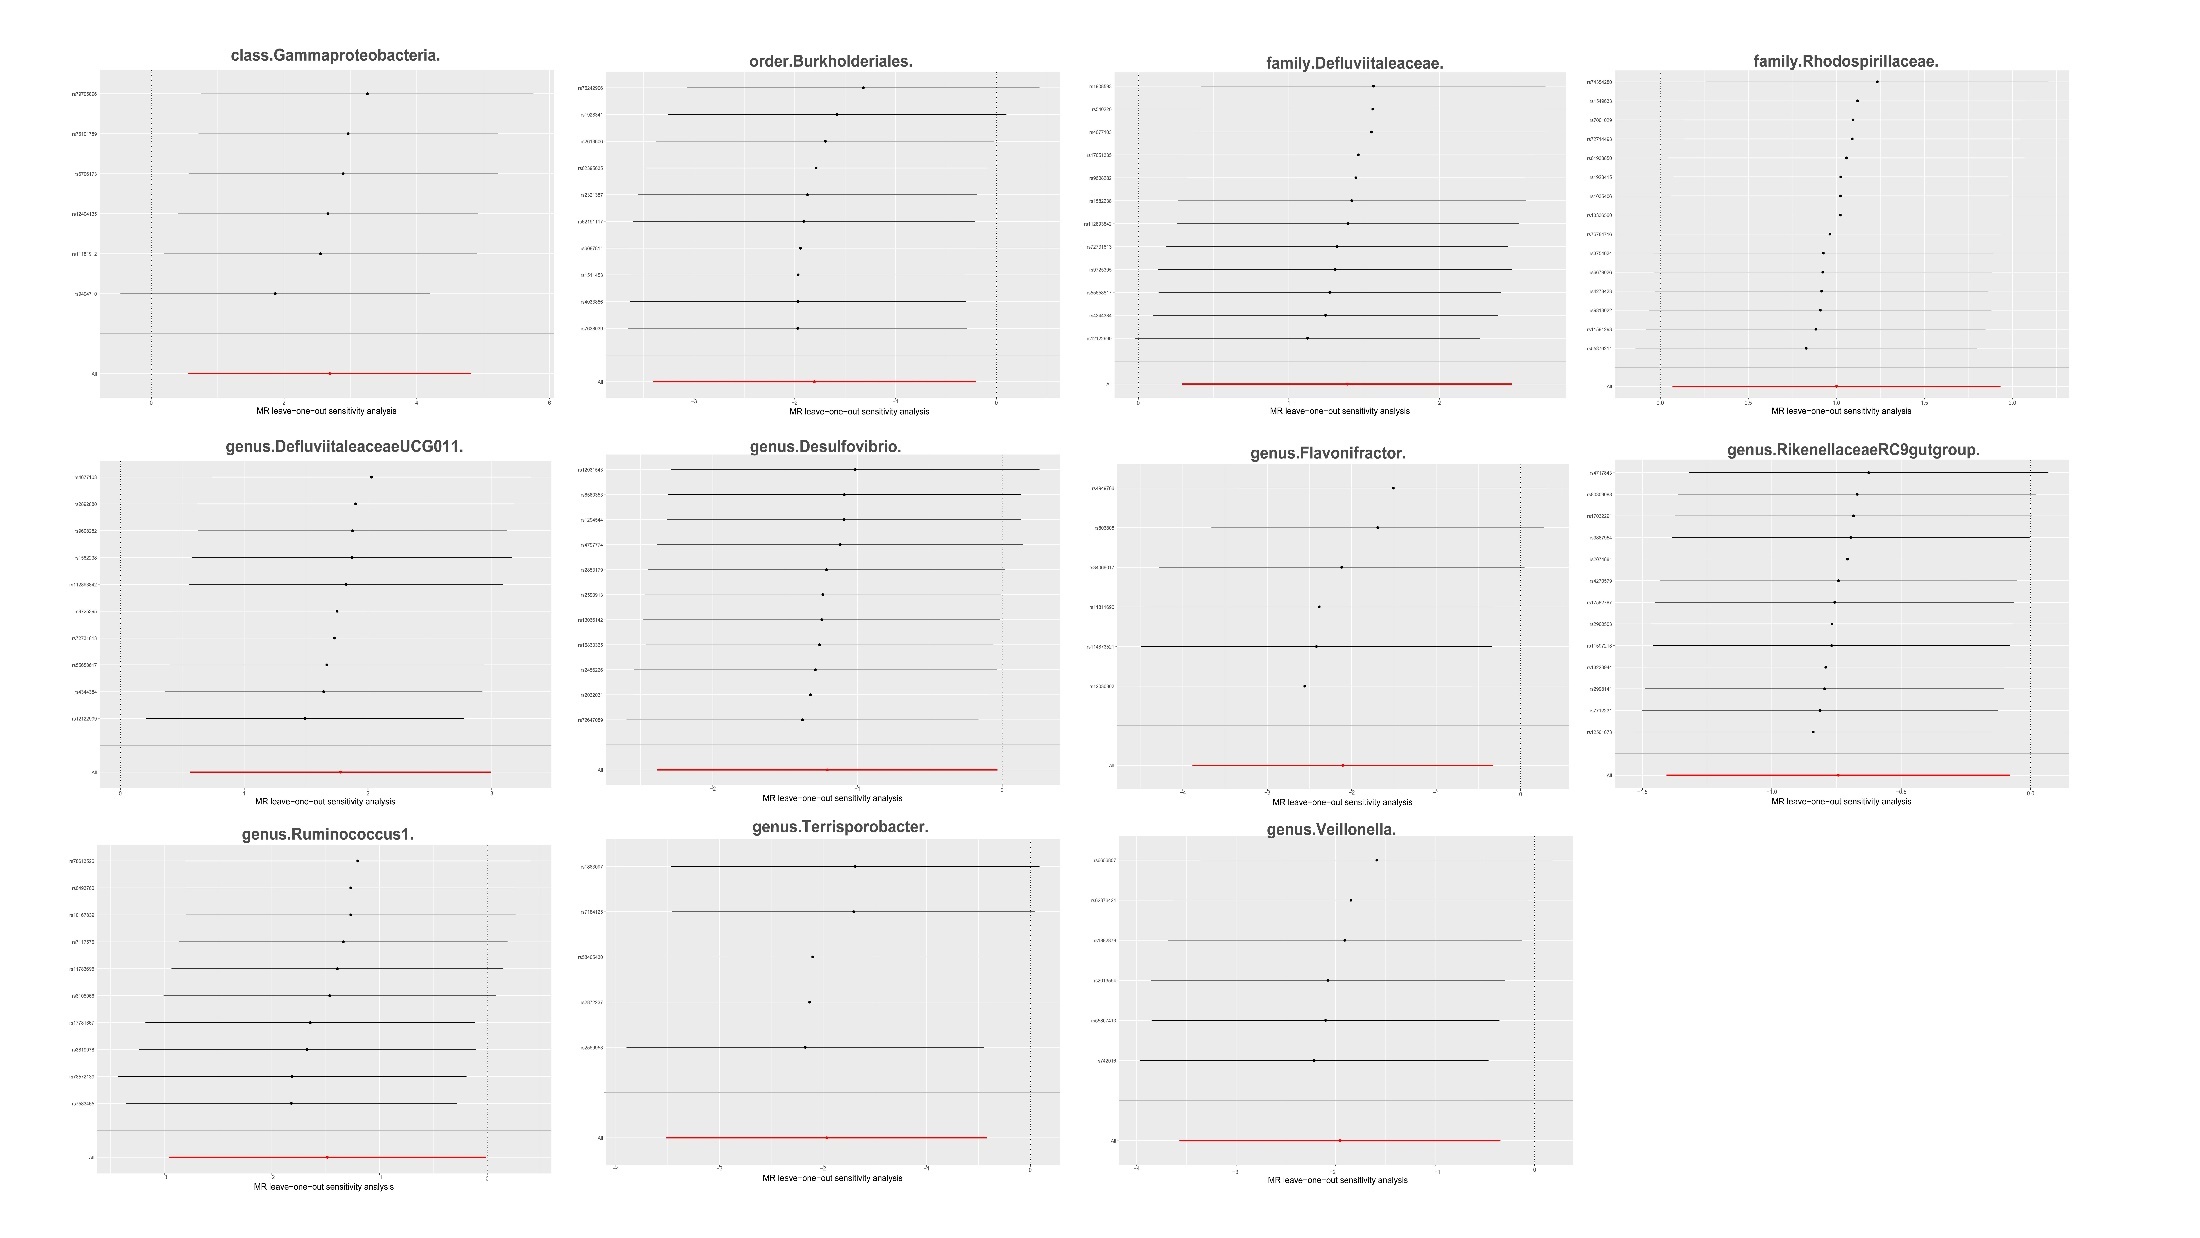
**

**Inducible urticaria**

**
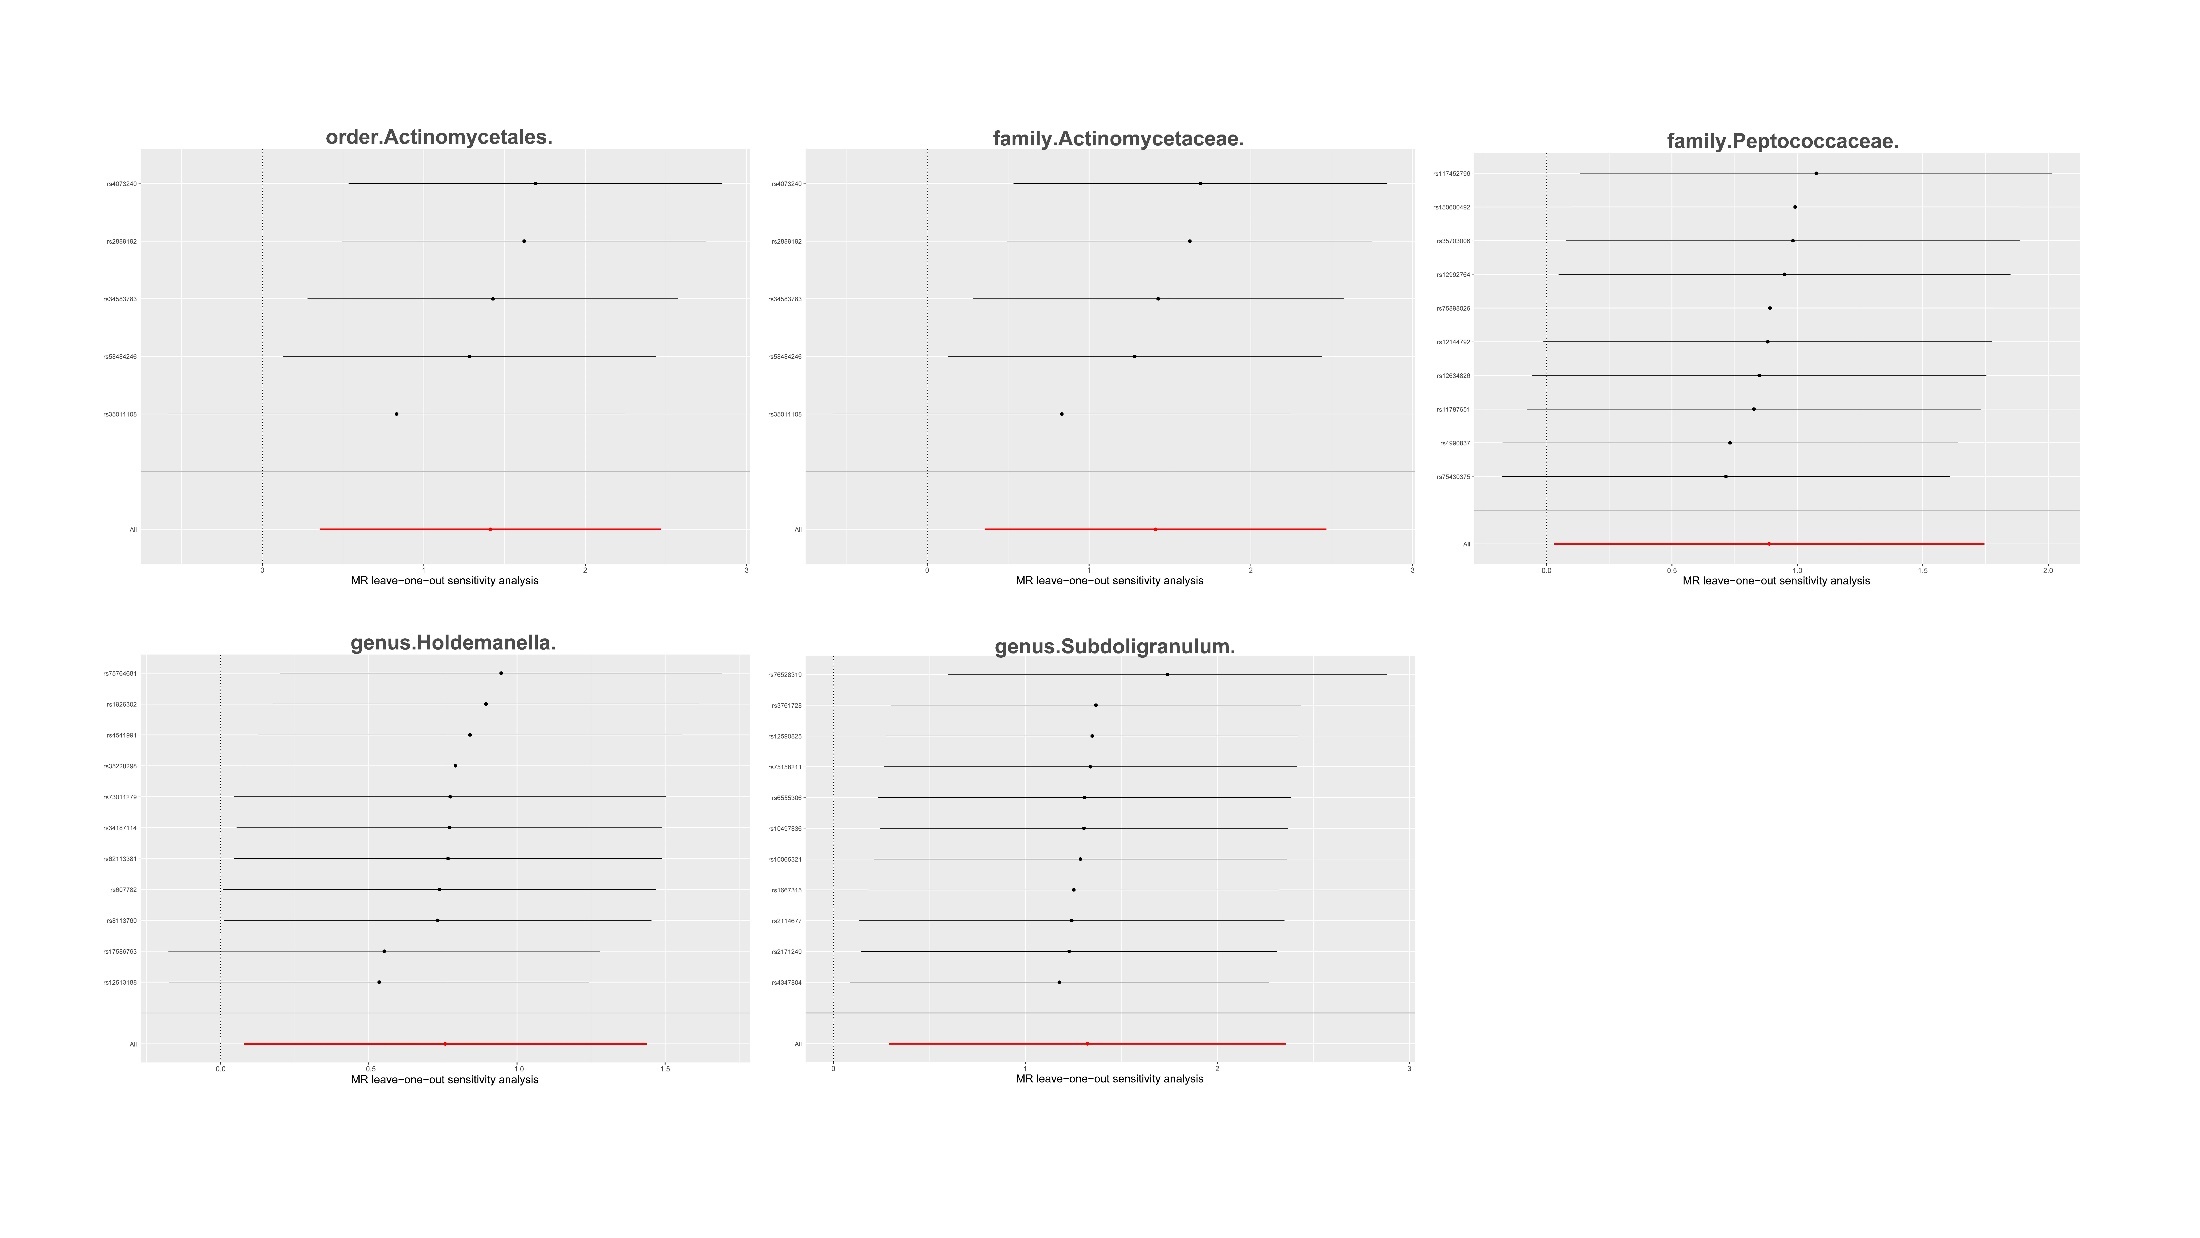
**

**Spontaneous urticaria**

**
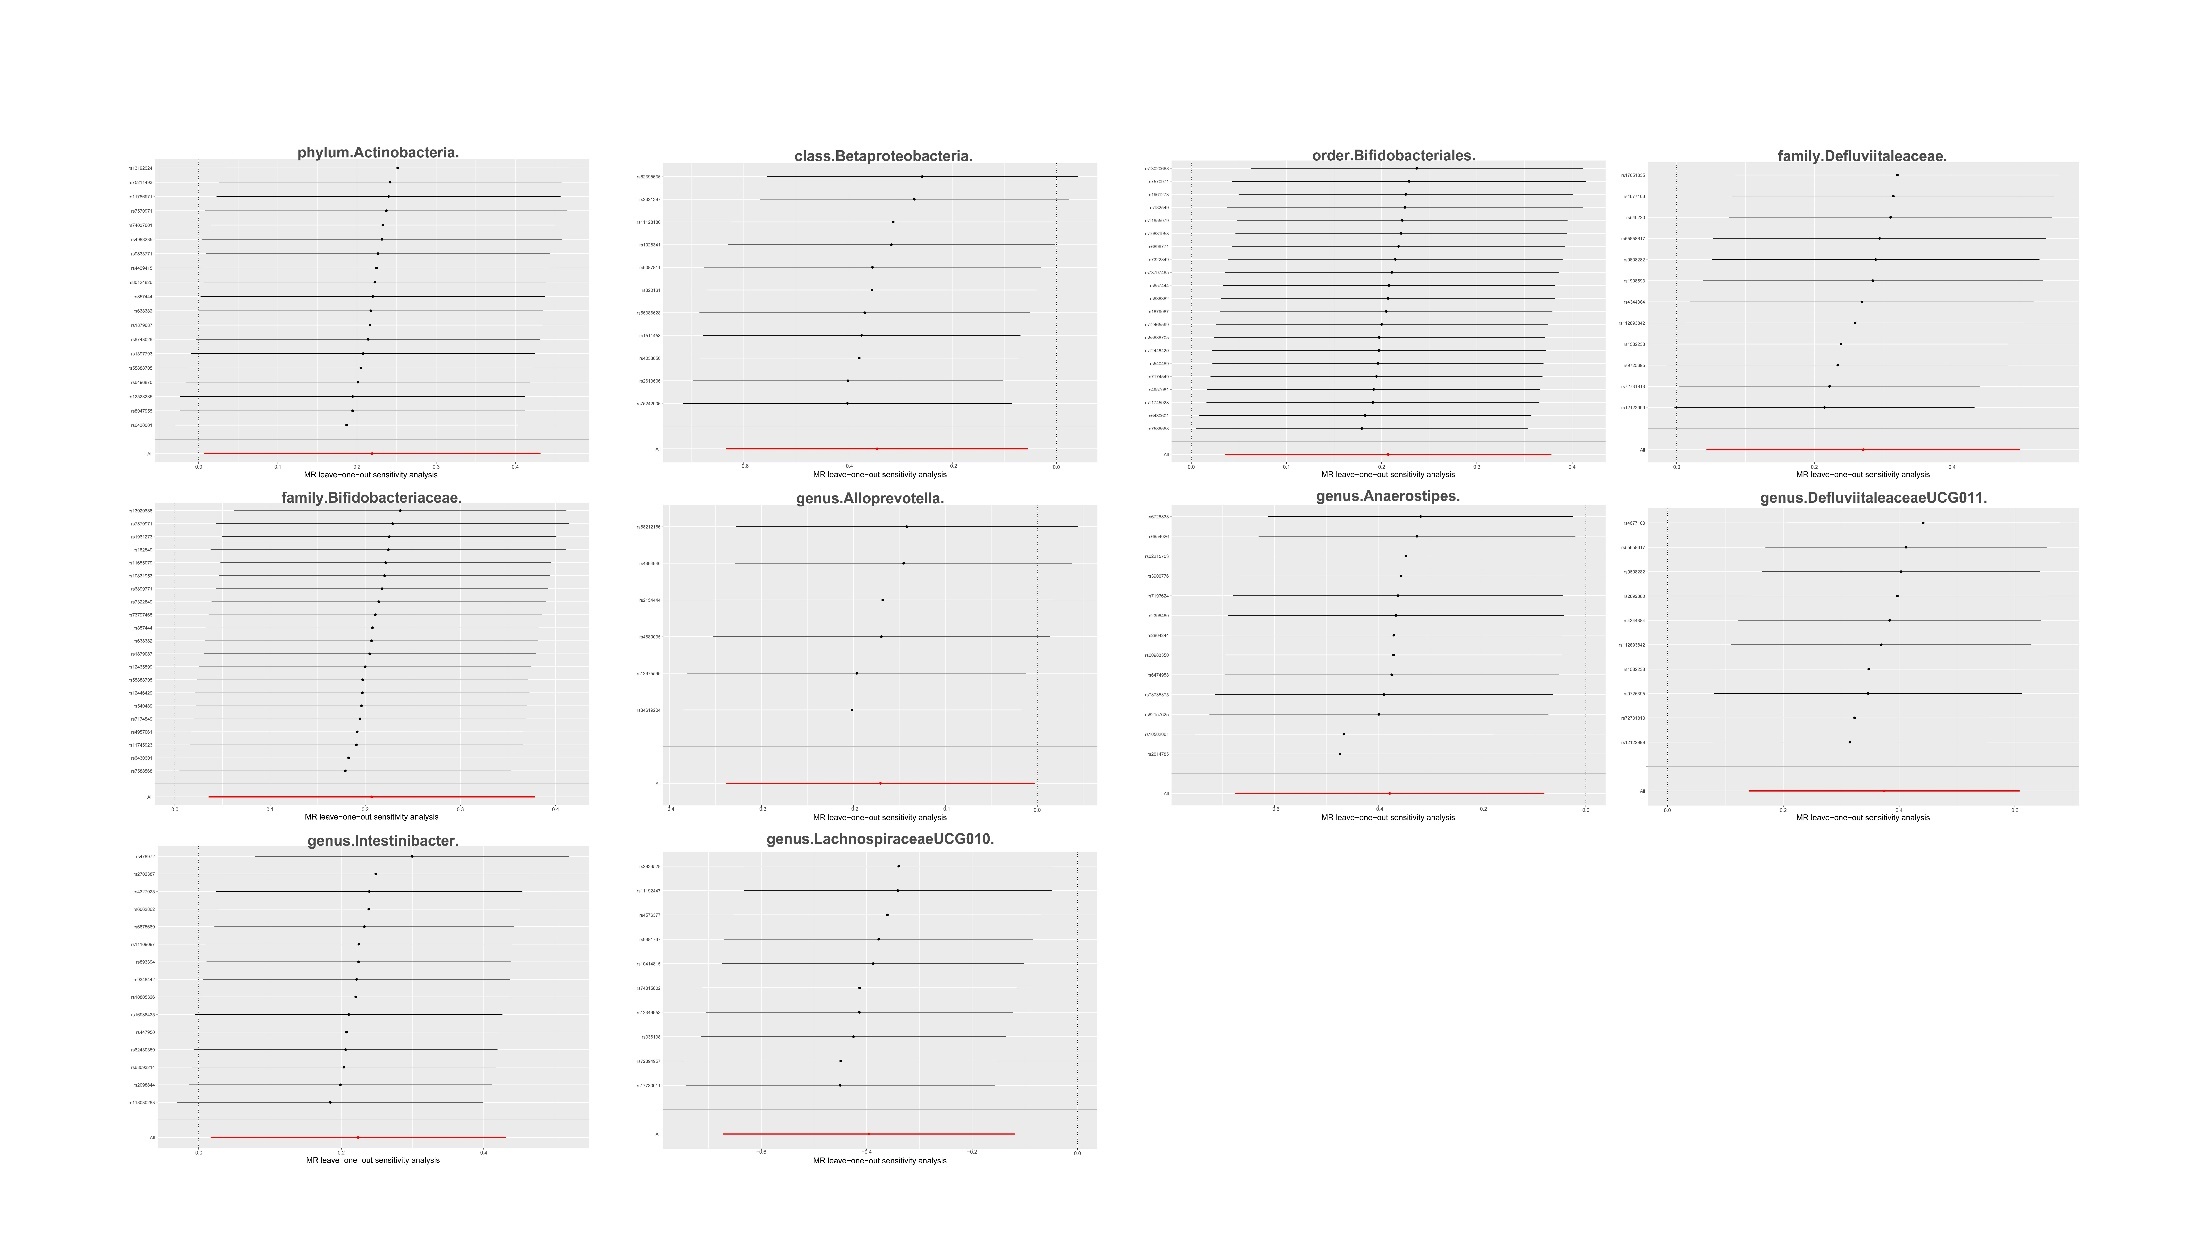
**

**Appendix 2**

**Dermatographic urticaria**

**
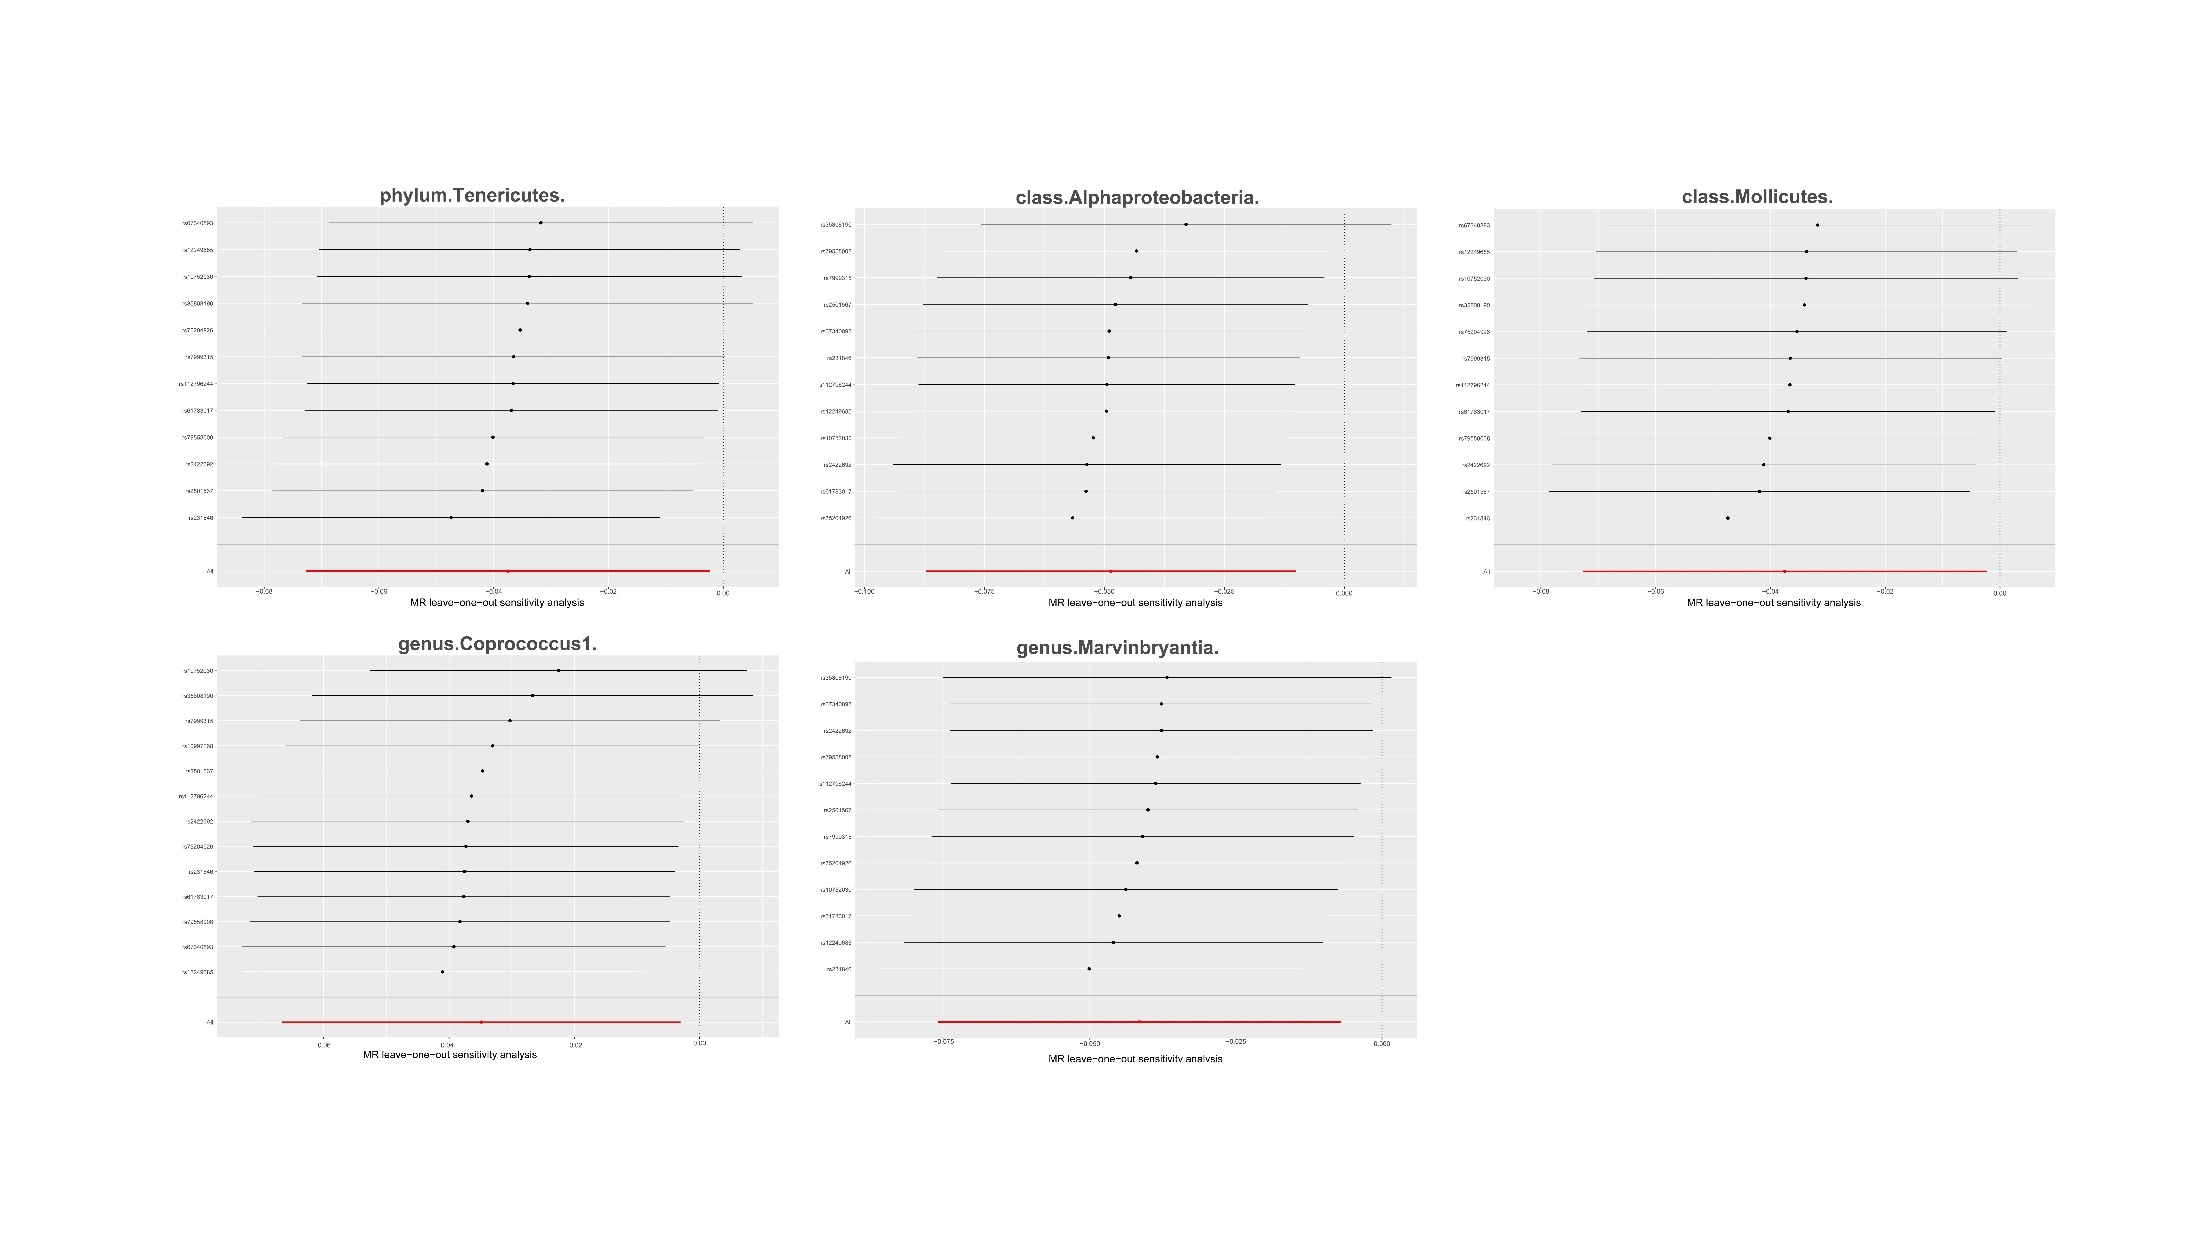
**

**Urticaria due to cold and heat**

**
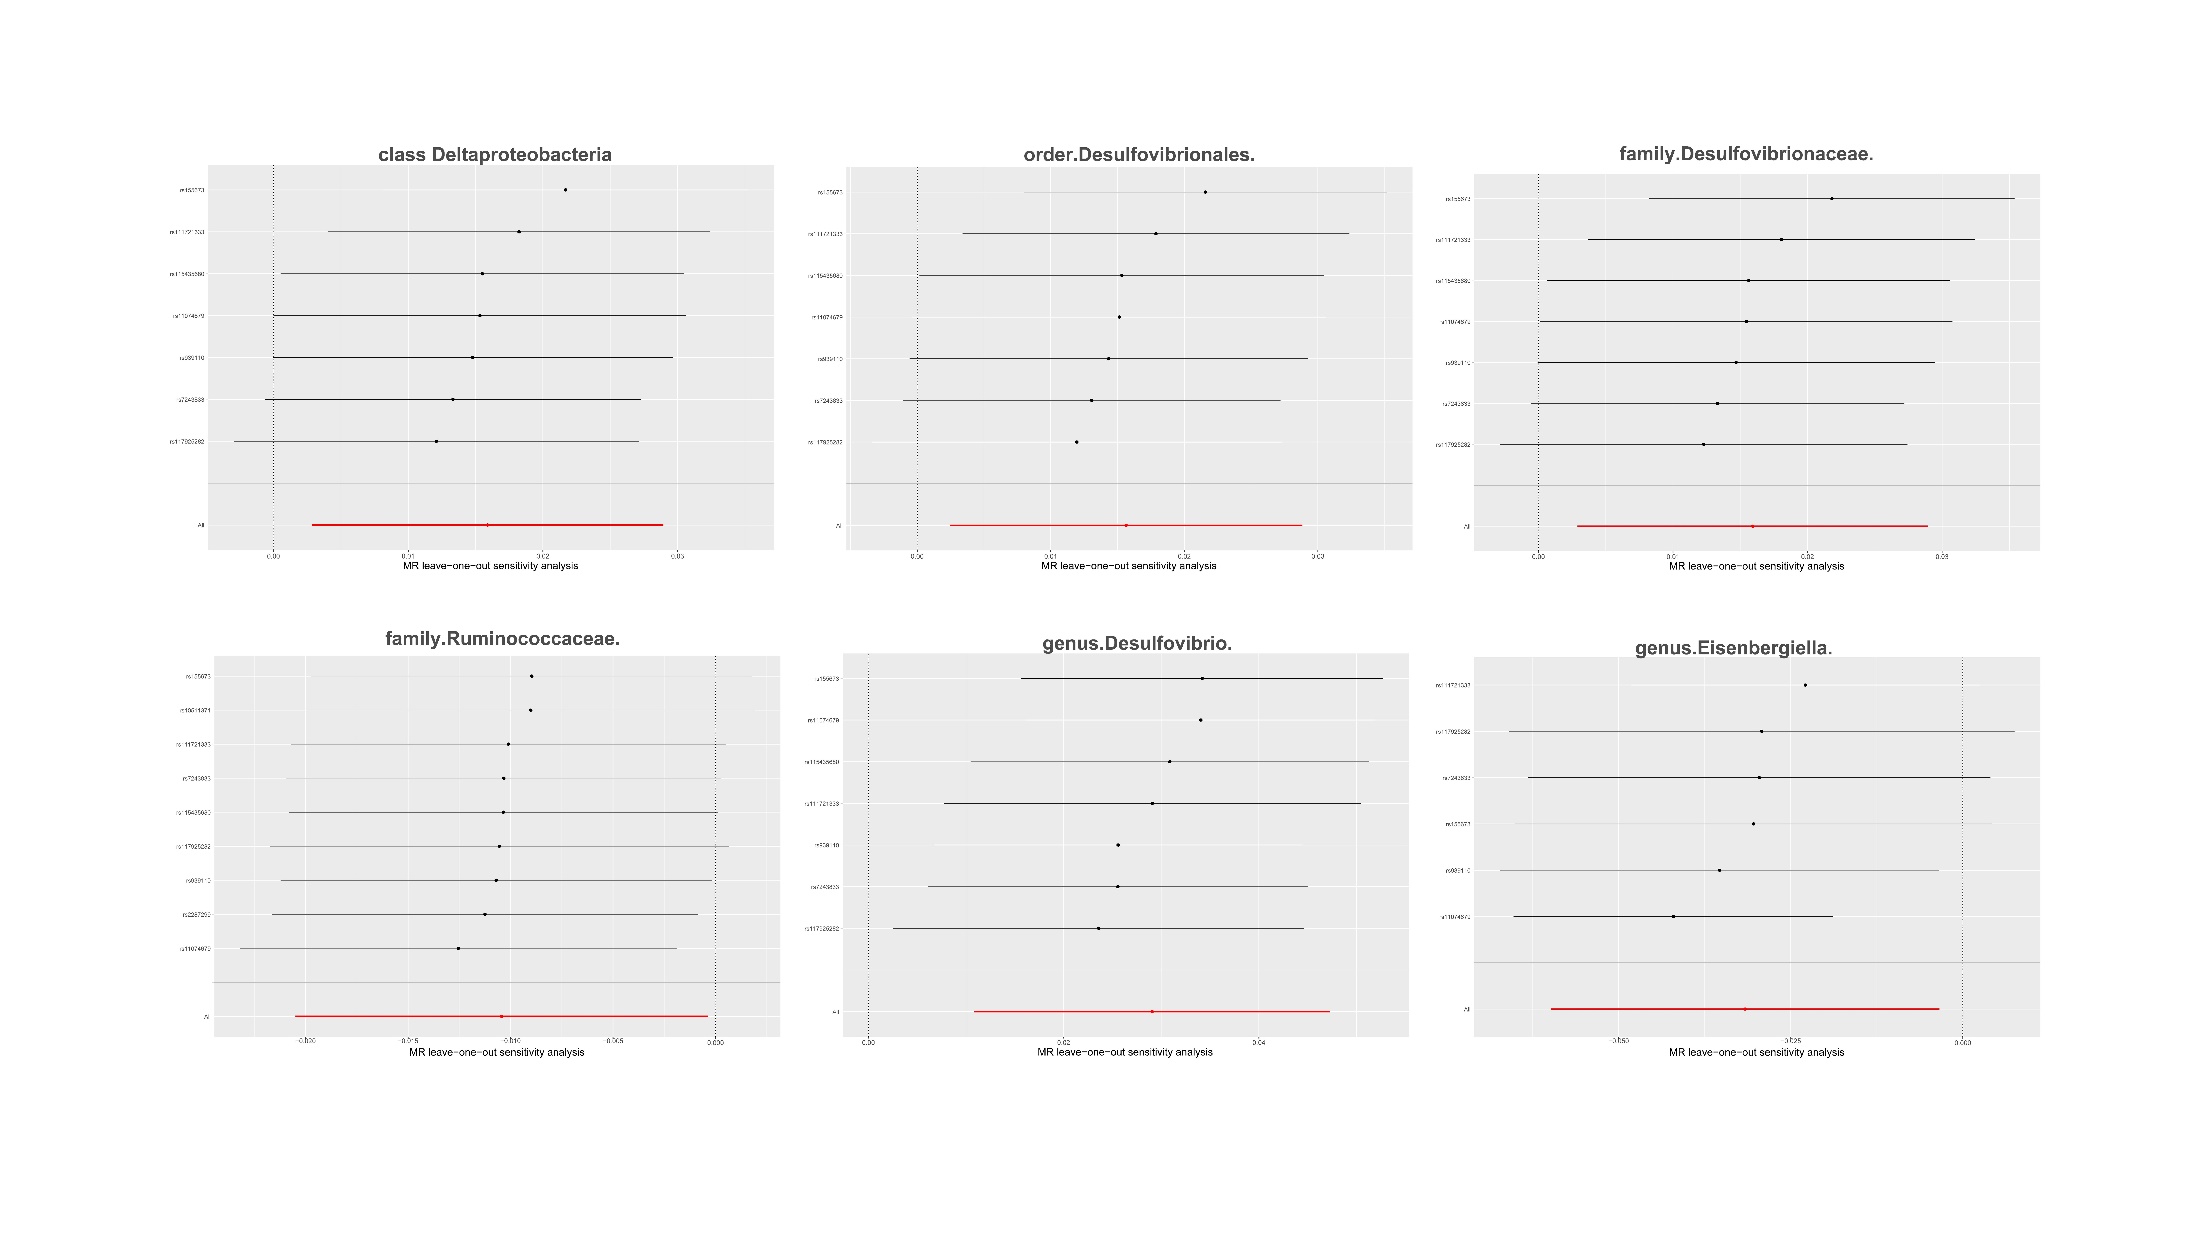
**

**Inducible urticaria**

**
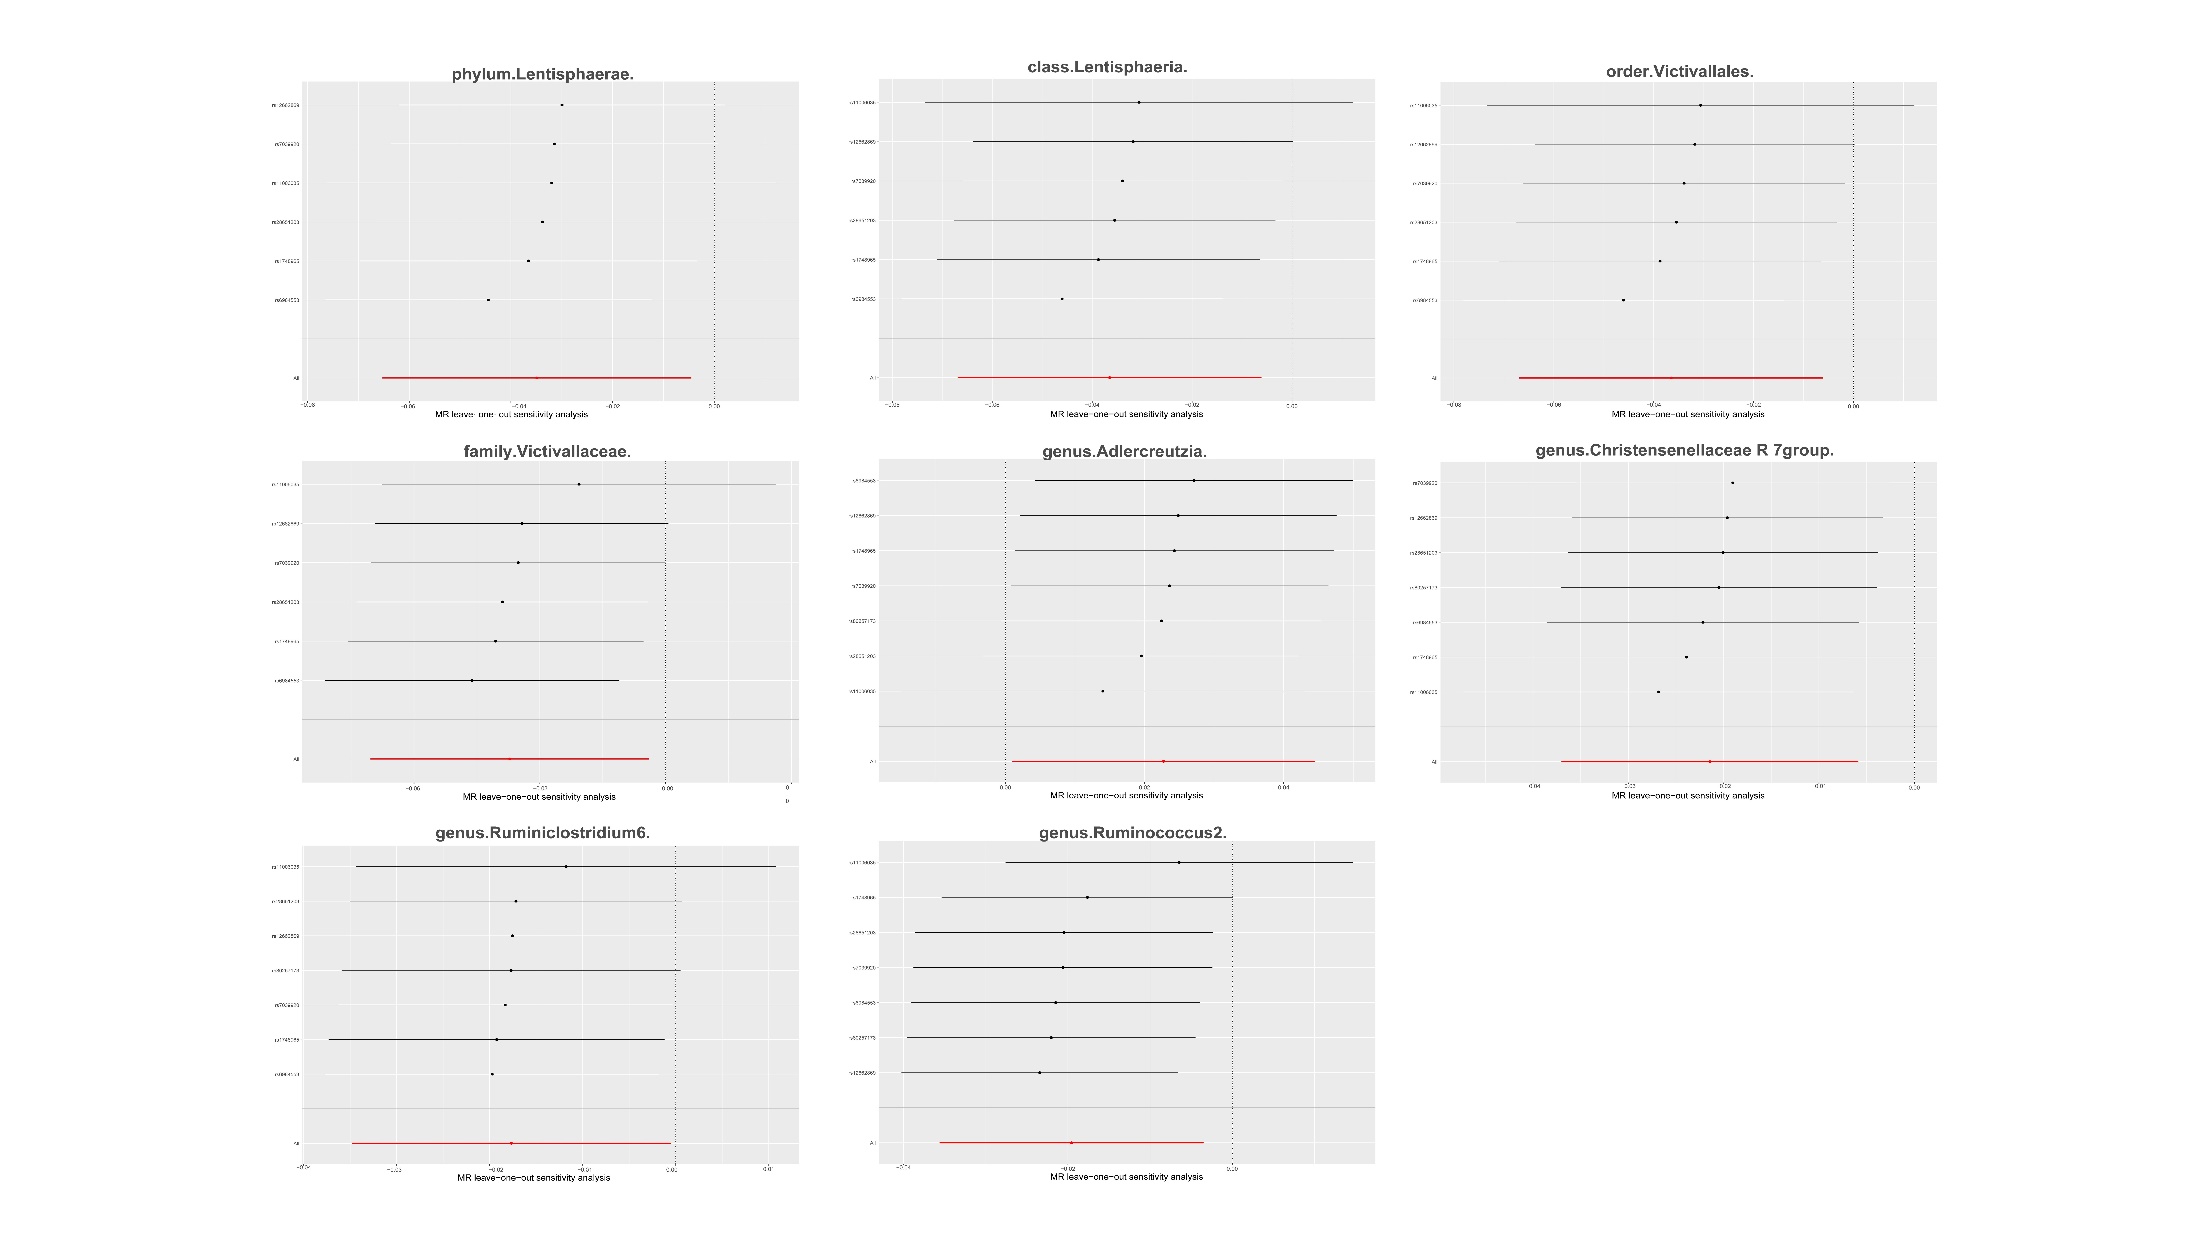
**

**Spontaneous urticaria**

**
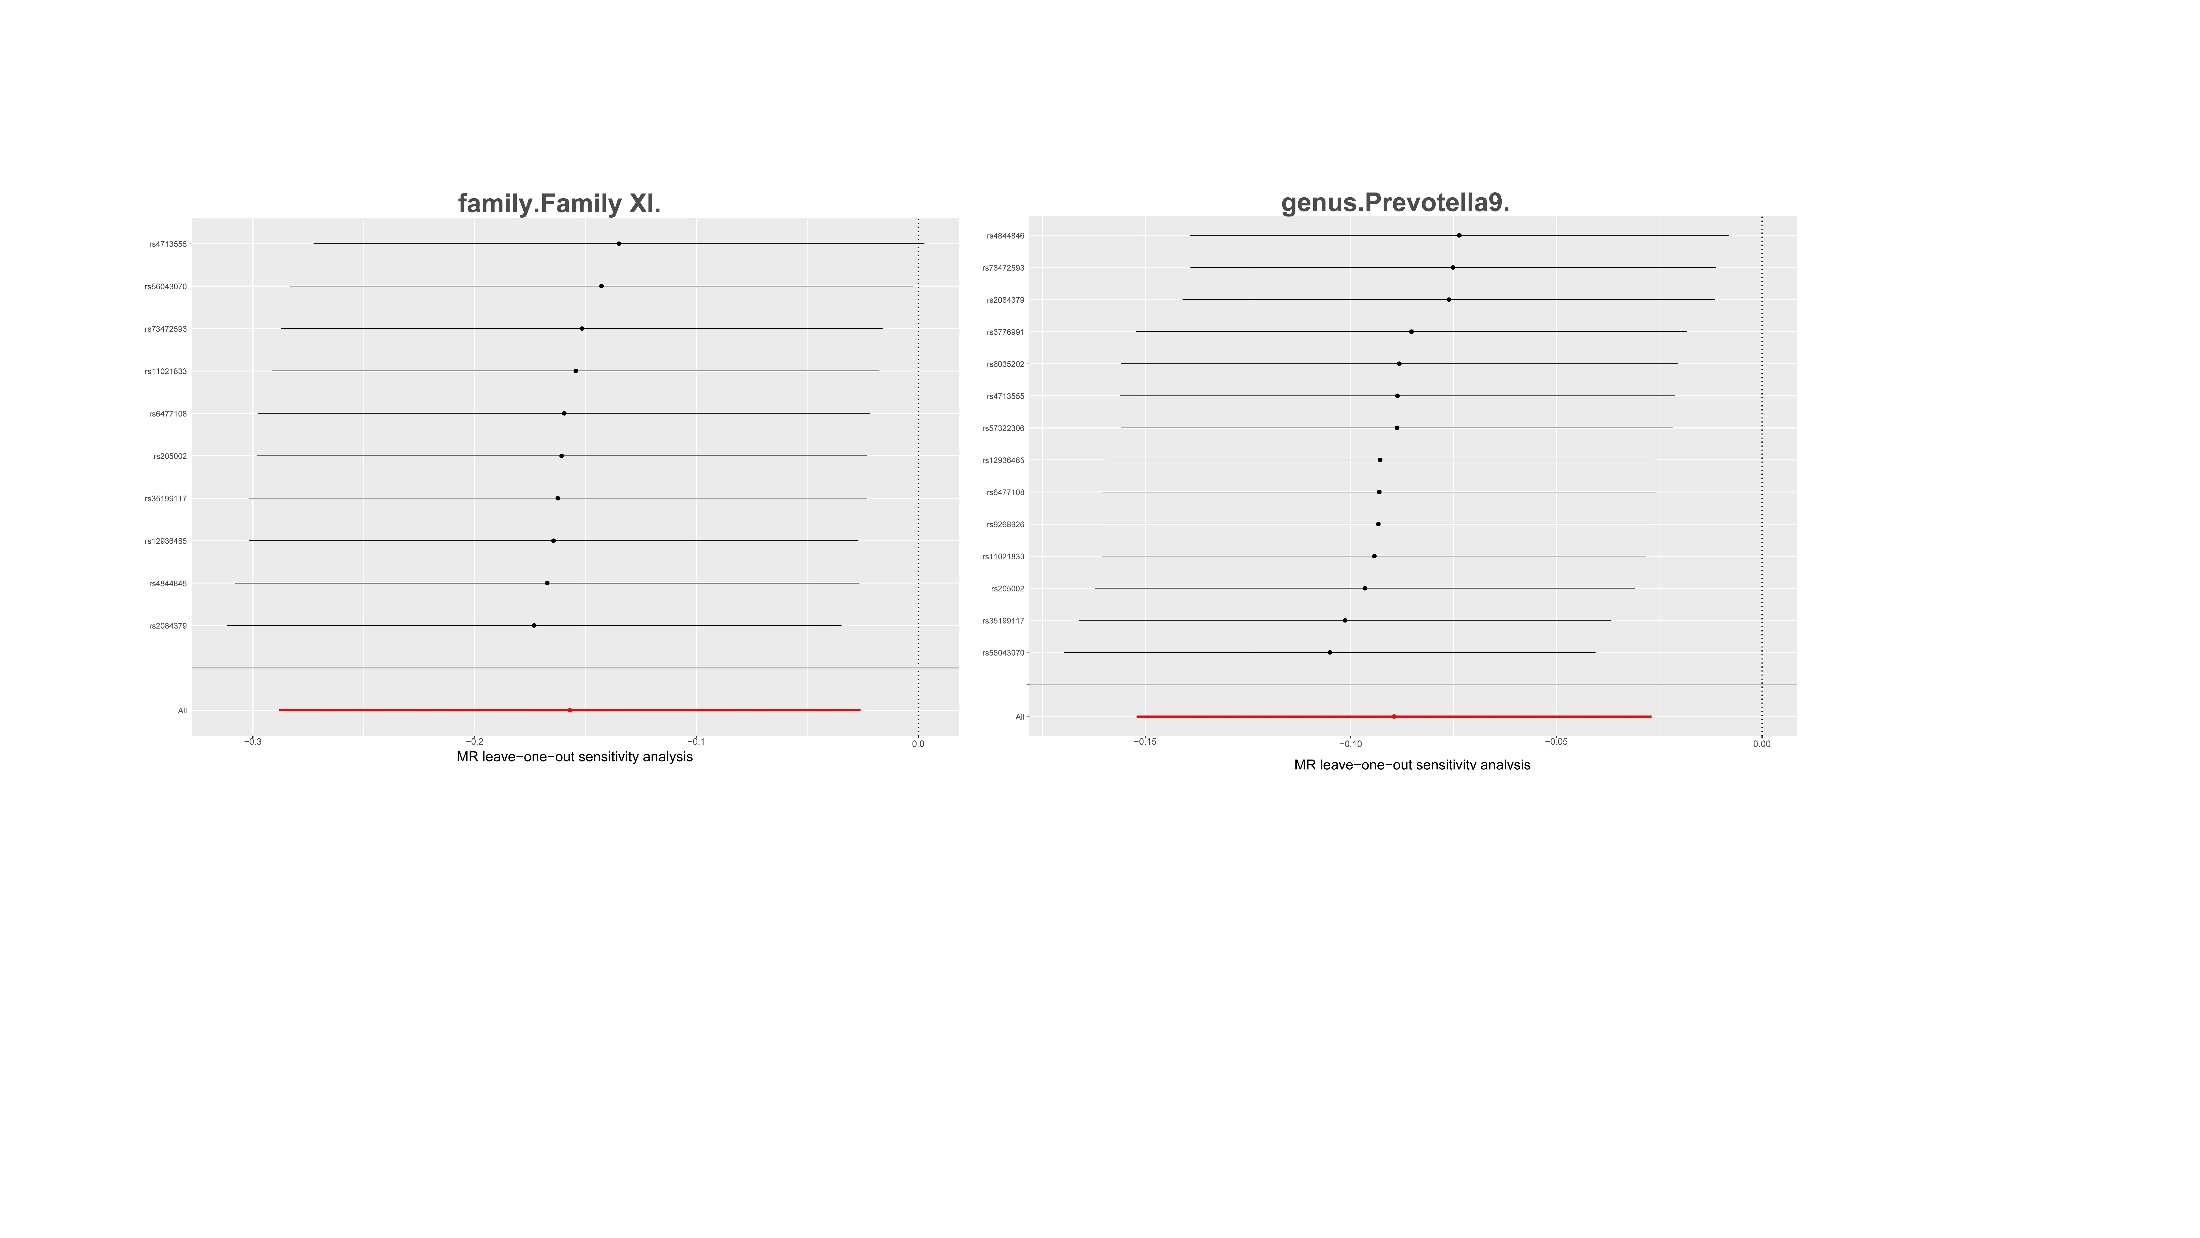
**
